# Supplementary material for: CO2adsorption by nitrogen-doped carbon nanotubes predicted by density-functional theory with dispersion-correcting potentials
Source: Royal Society of Chemistry journal article supplement (doi:10.1039/c0cp01537g), 2010-12-14
Supplement: c0cp01537g.pdf [file c0cp01537g.pdf]

*Supporting Information for*

CO<sub>2</sub> adsorption by N-doped carbon nanotubes – a study by DFT with dispersion-correcting potentials

Iain D. Mackie<sup>\*,†</sup> and Gino A. DiLabio<sup>‡</sup>

<sup>‡</sup>National Institute for Nanotechnology, National Research Council of Canada, 11421 Saskatchewan Drive, Edmonton, Alberta, Canada T6G 2M9, and <sup>†</sup>University of Alberta, Department of Physics, 11322 89th Avenue, Edmonton, Alberta, Canada T6G 2G7.

**Figure S1.** Sample input for Gaussian-03 demonstrating the use of DCPs.

**Table S2.** Binding energies (kcal/mol) for training-set using B971/Basis with optimized three-function dispersion correcting potentials on carbon.

**Table S3.** Mean signed deviations (MSD) of monomer separations (Å), relative to high-level theoretical results, for the set of non-covalently bound dimers using B971/Basis-DCP.

**Table S4.** Comparison of B971/Basis-DCP and M06-2X/6-31++G(d,p) binding energies (BE, kcal/mol) to CCSD(T)/CBS data for a series of N-containing heterocycles bound to CO<sub>2</sub>.

**Table S5.** Calculated binding energies (kcal/mol) for C<sub>6</sub>H<sub>6</sub>•CO<sub>2</sub>, C<sub>5</sub>NH<sub>5</sub>•CO<sub>2</sub> and C<sub>3</sub>N<sub>3</sub>H<sub>3</sub>•CO<sub>2</sub> using various computational methods.

**Table S6.** B971/6-31G(d)-DCP optimized coordinates (Å) for C<sub>1</sub>-symmetry C<sub>6</sub>H<sub>6</sub>•CO<sub>2</sub> dimer.

**Table S7.** B971/6-31G(d)-DCP optimized coordinates (Å) for C<sub>s</sub>-symmetry C<sub>6</sub>H<sub>6</sub>•CO<sub>2</sub> dimer.

**Table S8.** B971/6-31G(d)-DCP optimized coordinates (Å) for C<sub>2v</sub>-symmetry C<sub>6</sub>H<sub>6</sub>•CO<sub>2</sub> dimer.

**Table S9.** B971/6-31G(d)-DCP optimized coordinates (Å) for C<sub>6v</sub>-symmetry C<sub>6</sub>H<sub>6</sub>•CO<sub>2</sub> dimer.

**Table S10.** B971/6-31G(d)-DCP optimized coordinates (Å) for C<sub>1</sub>-symmetry C<sub>5</sub>NH<sub>5</sub>•CO<sub>2</sub> dimer.

**Table S11.** B971/6-31G(d)-DCP optimized coordinates (Å) for C<sub>s</sub>-symmetry C<sub>5</sub>NH<sub>5</sub>•CO<sub>2</sub> dimer.

**Table S12.** B971/6-31G(d)-DCP optimized coordinates (Å) for C<sub>1</sub>-symmetry C<sub>3</sub>N<sub>3</sub>H<sub>3</sub>•CO<sub>2</sub> dimer.

**Table S13.** B971/6-31G(d)-DCP optimized coordinates (Å) for C<sub>s</sub>-symmetry C<sub>3</sub>N<sub>3</sub>H<sub>3</sub>•CO<sub>2</sub> dimer.

**Table S14.** B971/6-31G(d)-DCP optimized coordinates (Å) for C<sub>1</sub>-symmetry C<sub>3</sub>N<sub>3</sub>H<sub>3</sub>•CO<sub>2</sub> dimer.

**Table S15.** B971/6-31G(d)-DCP optimized coordinates (Å) for C<sub>s</sub>-symmetry C<sub>3</sub>N<sub>3</sub>H<sub>3</sub>•CO<sub>2</sub> dimer.

**Table S16.** B971/6-31G(d)-DCP optimized coordinates (Å) for C<sub>3v</sub>-symmetry C<sub>3</sub>N<sub>3</sub>H<sub>3</sub>•CO<sub>2</sub> dimer.

**Table S17.** B971/6-31G(d)-DCP optimized coordinates (Å) for CO<sub>2</sub> bound to the exterior wall of [6,6]-SWNT.

**Table S18.** B971/6-31G(d)-DCP optimized coordinates (Å) for CO<sub>2</sub> bound to the interior wall of [6,6]-SWNT.

**Table S19.** B971/6-31G(d)-DCP optimized coordinates (Å) for CO<sub>2</sub> bound to the exterior wall of [6,6]-N-SWNT.

**Table S20.** B971/6-31G(d)-DCP optimized coordinates (Å) for CO<sub>2</sub> bound to the interior wall of [6,6]-N-SWNT.

**Table S21.** B971/6-31G(d)-DCP optimized coordinates (Å) for CO<sub>2</sub> bound to the exterior wall of [10,0]-SWNT.

**Table S22.** B971/6-31G(d)-DCP optimized coordinates (Å) for CO<sub>2</sub> bound to the interior wall of [10,0]-SWNT.

**Table S23.** B971/6-31G(d)-DCP optimized coordinates (Å) for CO<sub>2</sub> bound to the exterior wall of [10,0]-N-SWNT.

**Table S24.** B971/6-31G(d)-DCP optimized coordinates (Å) for CO<sub>2</sub> bound to the interior wall of [10,0]-N-SWNT.

**Table S25.** B971/6-31G(d)-DCP optimized coordinates (Å) for CO<sub>2</sub> bound to the exterior wall of [8,4]-SWNT.

**Table S26.** B971/6-31G(d)-DCP optimized coordinates (Å) for CO<sub>2</sub> bound to the interior wall of [8,4]-SWNT.

**Table S27.** B971/6-31G(d)-DCP optimized coordinates (Å) for CO<sub>2</sub> bound to the exterior wall of [8,4]-N-SWNT.

**Table S28.** B971/6-31G(d)-DCP optimized coordinates (Å) for CO<sub>2</sub> bound to the interior wall of [8,4]-N-SWNT.

**Figure S1.** Sample Gaussian-03 input demonstrating the use of DCPs.

```
#B971 Gen OPT Pseudo=Read counterpoise=2

Methane Dimer using optimised DCPs. The monomer is also calculated with the same DCPs.

0 1
C 0.000000 1.906281 0.000000 1
H -0.981163 1.425134 0.000000 1
H 0.553375 1.602684 0.892189 1
H 0.553375 1.602684 -0.892189 1
H -0.125117 2.992038 0.000000 1
C 0.000000 -1.906281 0.000000 2
H 0.125117 -2.992038 0.000000 2
H 0.981163 -1.425134 0.000000 2
H -0.553375 -1.602684 0.892189 2
H -0.553375 -1.602684 -0.892189 2

C H 0
6-31G(d)
****

C 0
C 3 0
  F and up
  3
  2 0.08 -0.001578
  2 0.12 0.00349
  2 0.009 -0.0000042
  S - F
  1
  2 1.0 0.0
  P - F
  1
  2 1.0 0.0
  D - F
  1
  2 1.0 0.0
```

**Table S2.** Binding energies (kcal/mol) for training-set using B971/Basis with optimized three-function dispersion correcting potentials on carbon.

| Hydrocarbon dimers                                | 6-31G(d) <sup>b</sup> | STO-6G <sup>c</sup> | High-level <sup>d</sup> |
|---------------------------------------------------|-----------------------|---------------------|-------------------------|
| CH <sub>4</sub> ·C <sub>6</sub> H <sub>6</sub>    | 1.14                  | 0.79                | 1.23 <sup>e</sup>       |
| (CH <sub>4</sub> ) <sub>2</sub>                   | 0.43                  | 0.21                | 0.51 <sup>f</sup>       |
| CH <sub>4</sub> ·C <sub>2</sub> H <sub>4</sub>    | 0.63                  | 0.55                | 0.50 <sup>g</sup>       |
| P-(C <sub>6</sub> H <sub>6</sub> ) <sub>2</sub>   | 1.35                  | 2.10                | 1.70 <sup>h</sup>       |
| SP-(C <sub>6</sub> H <sub>6</sub> ) <sub>2</sub>  | 2.30                  | 2.18                | 2.63 <sup>h</sup>       |
| T-(C <sub>6</sub> H <sub>6</sub> ) <sub>2</sub>   | 2.49                  | 1.40                | 2.61 <sup>h</sup>       |
| (C <sub>2</sub> H <sub>4</sub> ) <sub>2</sub>     | 1.43                  | 0.70                | 1.42 <sup>f</sup>       |
| (C <sub>2</sub> H <sub>2</sub> ) <sub>2</sub>     | 1.67                  | 0.44                | 1.38 <sup>i</sup>       |
| P-(C <sub>10</sub> H <sub>8</sub> ) <sub>2</sub>  | 3.83                  | 4.43                | 3.78 <sup>j</sup>       |
| PC-(C <sub>10</sub> H <sub>8</sub> ) <sub>2</sub> | 5.53                  | 4.86                | 5.28 <sup>j</sup>       |
| T-(C <sub>10</sub> H <sub>8</sub> ) <sub>2</sub>  | 4.64                  | 2.74                | 4.34 <sup>j</sup>       |
| TC-(C <sub>10</sub> H <sub>8</sub> ) <sub>2</sub> | 3.38                  | 2.39                | 3.09 <sup>j</sup>       |
| SD <sup>a</sup>                                   | 0.03                  | 0.47                |                         |
| %AD                                               | 11.04                 | 32.70               |                         |
| <b>Heteroatom dimers</b>                          |                       |                     |                         |
| HCN·HF                                            | 6.85                  | 4.75                | 7.49 <sup>i</sup>       |
| C <sub>2</sub> H <sub>4</sub> ·HF                 | 5.19                  | 2.23                | 4.50 <sup>i</sup>       |
| (CF <sub>4</sub> ) <sub>2</sub>                   | 0.85                  | 0.54                | 0.78 <sup>k</sup>       |
| (CH <sub>3</sub> F) <sub>2</sub>                  | 2.26                  | 2.97                | 2.33 <sup>l</sup>       |
| CH <sub>4</sub> ·HF                               | 1.52                  | 0.49                | 1.65 <sup>g</sup>       |
| CH <sub>4</sub> ·NH <sub>3</sub>                  | 1.09                  | 2.67                | 0.76 <sup>h</sup>       |
| (CO <sub>2</sub> ) <sub>2</sub>                   | 1.39                  | 0.68                | 1.37 <sup>m</sup>       |
| (H <sub>2</sub> CO) <sub>2</sub>                  | 3.26                  | 2.16                | 3.72 <sup>i</sup>       |
| H <sub>2</sub> O·C <sub>6</sub> H <sub>6</sub>    | 3.49                  | 1.97                | 3.17 <sup>n</sup>       |
| (H <sub>3</sub> CCN) <sub>2</sub>                 | 5.65                  | 3.42                | 6.16 <sup>l</sup>       |
| SD <sup>a</sup>                                   | -0.04                 | 0.94                |                         |
| %AD                                               | 11.81                 | 64.76               |                         |
| SD (Total)                                        | 0.00                  | 0.68                |                         |
| %AD (Total)                                       | 11.39                 | 47.27               |                         |

<sup>a</sup>Defined as the High-level value minus DCP-calculated. <sup>b</sup>with counterpoise corrections,  $\zeta_1 = 0.08$ ,  $c_1 = -0.001578$ ,  $\zeta_2 = 0.12$ ,  $c_2 = 0.00349$ ,  $\zeta_3 = 0.009$ ,  $c_3 = -0.0000042$ . <sup>c</sup> $\zeta_1 = 0.06$ ,  $c_1 = -0.0005$ ,  $\zeta_2 = 0.12$ ,  $c_2 = 0.004$ ,  $\zeta_3 = 0.00725$ ,  $c_3 = -0.000001$ . <sup>d</sup>High-level data are generally of large basis set, CCSD(T) quality, with the exception of those for the naphthalene dimers. <sup>e</sup>ref. 1. <sup>f</sup>ref. 2. <sup>g</sup>ref. 3. <sup>h</sup>ref. 4. <sup>i</sup>ref. 5. <sup>j</sup>ref. 6. <sup>k</sup>ref. 7. <sup>l</sup>ref. 8. <sup>m</sup>ref. 9. <sup>n</sup>ref. 10.

**Table S3.** Signed deviations of monomer separations (Å), relative to high-level theoretical results, for the set of non-covalently bound dimers using B971/STO-6G-DCP.

| hydrocarbon dimers                                | Separation <sup>a</sup>                             | STO-6G | High-level <sup>b</sup> |
|---------------------------------------------------|-----------------------------------------------------|--------|-------------------------|
| CH <sub>4</sub> ·C <sub>6</sub> H <sub>6</sub>    | H <sub>4</sub> C-CM(C <sub>6</sub> H <sub>6</sub> ) | +0.1   | 3.8                     |
| (CH <sub>4</sub> ) <sub>2</sub>                   | C-C                                                 | +0.3   | 3.6                     |
| CH <sub>4</sub> ·C <sub>2</sub> H <sub>4</sub>    | H <sub>4</sub> C-CM(C <sub>2</sub> H <sub>4</sub> ) | -0.3   | 4.2                     |
| P-(C <sub>6</sub> H <sub>6</sub> ) <sub>2</sub>   | CM-CM                                               | -0.1   | 3.9                     |
| SP-(C <sub>6</sub> H <sub>6</sub> ) <sub>2</sub>  | CM-CM                                               | 0      | 3.9                     |
| T-(C <sub>6</sub> H <sub>6</sub> ) <sub>2</sub>   | CM-CM                                               | +0.2   | 5.0                     |
| (C <sub>2</sub> H <sub>4</sub> ) <sub>2</sub>     | CM-CM                                               | +0.2   | 3.8                     |
| (C <sub>2</sub> H <sub>2</sub> ) <sub>2</sub>     | CM-CM                                               | -0.2   | 4.3                     |
| P-(C <sub>10</sub> H <sub>8</sub> ) <sub>2</sub>  | CM-CM                                               | -0.1   | 3.8                     |
| PC-(C <sub>10</sub> H <sub>8</sub> ) <sub>2</sub> | CM-CM                                               | 0      | 3.6                     |
| T-(C <sub>10</sub> H <sub>8</sub> ) <sub>2</sub>  | CM-CM                                               | +0.2   | 5.0                     |
| TC-(C <sub>10</sub> H <sub>8</sub> ) <sub>2</sub> | CM-CM                                               | 0      | 5.2                     |
| MSD                                               |                                                     | 0      |                         |
| heteroatom dimers                                 |                                                     |        |                         |
| HCN·HF                                            | N-HF                                                | 0      | 1.9                     |
| C <sub>2</sub> H <sub>4</sub> ·HF                 | FH-CM(C <sub>2</sub> H <sub>4</sub> )               | +0.1   | 2.2                     |
| (CF <sub>4</sub> ) <sub>2</sub>                   | C-C                                                 | 0      | 4.0                     |
| (CH <sub>3</sub> F) <sub>2</sub>                  | C-C                                                 | -0.6   | 3.9                     |
| CH <sub>4</sub> ·HF                               | C-HF                                                | +0.5   | 2.3                     |
| CH <sub>4</sub> ·NH <sub>3</sub>                  | C-N                                                 | -0.7   | 3.9                     |
| (CO <sub>2</sub> ) <sub>2</sub>                   | C-C                                                 | +0.3   | 3.6                     |
| (H <sub>2</sub> CO) <sub>2</sub>                  | C-C                                                 | -0.2   | 3.6                     |
| H <sub>2</sub> O·C <sub>6</sub> H <sub>6</sub>    | O-CM(C <sub>6</sub> H <sub>6</sub> )                | 0      | 3.4                     |
| (H <sub>3</sub> CCN) <sub>2</sub>                 | C-C                                                 | +0.1   | 3.4                     |
| MSD                                               |                                                     | -0.1   |                         |

<sup>a</sup>CM = centre-of-mass of heavy atoms <sup>b</sup>High-level data are generally of large basis set, CCSD(T) quality, with the exception of those for the naphthalene dimers, see Table S2 for references.

**Table S4.** Comparison of B971/Basis-DCP and M06-2X/6-31++G(d,p) binding energies (BE, kcal/mol) to CCSD(T)/CBS data for a series of N-containing heterocycles bound to CO<sub>2</sub>.

| Aromatic system   | B971   |                       | M06-2X <sup>a</sup> | High-level <sup>11</sup> |
|-------------------|--------|-----------------------|---------------------|--------------------------|
|                   | STO-6G | 6-31G(d) <sup>a</sup> |                     |                          |
| pyridine          | 2.55   | 4.01                  | 5.14                | 4.46                     |
| pyrimidine        | 2.10   | 3.61                  | 4.65                | 4.06                     |
| pyridazine        | 2.01   | 3.48                  | 4.53                | 3.96                     |
| pyrazine          | 2.17   | 3.56                  | 4.56                | 3.95                     |
| 1,3,5-triazine    | 1.83   | 3.16                  | 4.10                | 3.59                     |
| imidazole         | 2.62   | 4.04                  | 5.01                | 4.53                     |
| 2H-tetrazole      | 8.09   | 3.47                  | 4.57                | 4.56                     |
| purine (BS1)      | 2.28   | 3.75                  | 4.83                | 4.17                     |
| purine (BS2)      | 2.50   | 3.75                  | 4.66                | 4.21                     |
| purine (BS3)      | 7.80   | 5.11                  | 6.05                | 5.55                     |
| imidazopyridine   | 7.40   | 5.29                  | 6.32                | 5.78                     |
| adenine           | 7.52   | 5.38                  | 6.55                | 5.90                     |
| imidazopyridamine | 7.28   | 5.58                  | 6.79                | 6.12                     |
| MAD               | 0.36   | 0.51                  | 0.53                |                          |
| AD (%)            | 42.7   | 11.1                  | 11.7                |                          |

<sup>a</sup>Includes counterpoise corrections.

**Table S5.** Calculated binding energies (kcal/mol) for C<sub>6</sub>H<sub>6</sub>•CO<sub>2</sub>, C<sub>5</sub>NH<sub>5</sub>•CO<sub>2</sub> and C<sub>3</sub>N<sub>3</sub>H<sub>3</sub>•CO<sub>2</sub> using various computational methods.

| System <sup>a</sup> /Symmetry        |                 | B971-DCP              |             | M06-2X<br>6-31++G(d,p) <sup>b</sup> | CCSD(T)/CBS <sup>c</sup> |
|--------------------------------------|-----------------|-----------------------|-------------|-------------------------------------|--------------------------|
|                                      |                 | 6-31G(d) <sup>b</sup> | aug-cc-pVTZ |                                     |                          |
| <b>CO<sub>2</sub>•Benzene</b>        |                 |                       |             |                                     |                          |
| <b>2.1</b>                           | C <sub>1</sub>  | 3.02                  | 2.92        | 2.95                                | 2.78                     |
| <b>2.2</b>                           | C <sub>s</sub>  | 3.01                  | 2.91        | 2.51                                | 2.77                     |
| <b>2.3</b>                           | C <sub>2v</sub> | 2.87                  | 2.72        | 2.31                                | 2.56                     |
| <b>2.4</b>                           | C <sub>6v</sub> | 0.46                  | 0.71        | 0.28                                | 0.82                     |
| <b>CO<sub>2</sub>•Pyridine</b>       |                 |                       |             |                                     |                          |
| <b>2.5</b>                           | C <sub>1</sub>  | 2.69                  | 2.42        | 2.07                                | 2.36                     |
| <b>2.6</b>                           | C <sub>s</sub>  | 1.02                  | 1.00        | 0.14                                | 1.01                     |
| <b>2.7</b>                           | C <sub>1</sub>  | 2.33                  | 2.31        | 1.58                                | 2.31                     |
| <b>2.8</b>                           | C <sub>s</sub>  | 0.67                  | 0.87        | 0.46                                | 1.05                     |
| <b>CO<sub>2</sub>•1,3,5-triazine</b> |                 |                       |             |                                     |                          |
| <b>2.9</b>                           | C <sub>1</sub>  | 1.75                  | 1.79        | 1.83                                | 2.13                     |
| <b>2.10</b>                          | C <sub>s</sub>  | 1.16                  | 1.19        | 0.48                                | 1.42                     |
| <b>2.11</b>                          | C <sub>3v</sub> | 1.13                  | 1.31        | 1.69                                | 1.74                     |
| MAD <sup>c</sup>                     |                 | 0.29                  | 0.16        | 0.45                                |                          |
| M%AD                                 |                 | 17.9                  | 9.7         | 32.8                                |                          |

<sup>a</sup>See main text for structures. <sup>b</sup>Includes counterpoise corrections

**Table S6.** B971/6-31G(d)-DCP optimized coordinates (Å) for  $C_1$ -symmetry  $C_6H_6 \cdot CO_2$  dimer.

|   |             |             |             |
|---|-------------|-------------|-------------|
| C | -2.15576500 | 0.56875000  | 0.07457000  |
| O | -2.14980700 | -0.38163700 | -0.61007600 |
| O | -2.19119500 | 1.52245600  | 0.75681300  |
| C | 0.96661300  | -1.38500000 | 0.85346000  |
| C | 0.95684300  | -0.05728400 | 1.32395200  |
| C | 1.12880900  | 1.01134200  | 0.42074300  |
| C | 1.30836400  | 0.75068000  | -0.95210000 |
| C | 1.31862700  | -0.57774300 | -1.42165000 |
| C | 1.14819500  | -1.64505000 | -0.51916700 |
| H | 0.83338800  | -2.21115000 | 1.55117600  |
| H | 0.81650600  | 0.14500300  | 2.38532000  |
| H | 1.11820000  | 2.03804500  | 0.78447100  |
| H | 1.44102200  | 1.57669200  | -1.65020100 |
| H | 1.45550700  | -0.77899200 | -2.48352600 |
| H | 1.15216600  | -2.67185800 | -0.88288800 |

**Table S7.** B971/6-31G(d)-DCP optimized coordinates (Å) for  $C_s$ -symmetry  $C_6H_6 \cdot CO_2$  dimer.

|   |             |             |             |
|---|-------------|-------------|-------------|
| C | -2.16693900 | 0.65336600  | 0.00000000  |
| O | -2.21932000 | -0.51676300 | 0.00000000  |
| O | -2.13973300 | 1.82618400  | 0.00000000  |
| C | 1.13989000  | -1.56284500 | 0.70407300  |
| C | 1.13989000  | -0.34281900 | 1.40887000  |
| C | 1.14035300  | 0.87733600  | 0.70489800  |
| C | 1.14035300  | 0.87733600  | -0.70489800 |
| C | 1.13989000  | -0.34281900 | -1.40887000 |
| C | 1.13989000  | -1.56284500 | -0.70407300 |
| H | 1.13607300  | -2.50638200 | 1.24865800  |
| H | 1.14027200  | -0.34300400 | 2.49844600  |
| H | 1.13988500  | 1.82156500  | 1.24830800  |
| H | 1.13988500  | 1.82156500  | -1.24830800 |
| H | 1.14027200  | -0.34300400 | -2.49844600 |
| H | 1.13607300  | -2.50638200 | -1.24865800 |

**Table S8.** B971/6-31G(d)-DCP optimized coordinates (Å) for  $C_{2v}$ -symmetry  $C_6H_6 \cdot CO_2$  dimer.

|   |             |             |             |
|---|-------------|-------------|-------------|
| C | 0.00000000  | 0.00000000  | 2.22328400  |
| O | 0.00000000  | 1.17205900  | 2.23639100  |
| O | 0.00000000  | -1.17205900 | 2.23639100  |
| C | -1.22002000 | 0.70463800  | -1.16936800 |
| C | -1.22002000 | -0.70463800 | -1.16936800 |
| C | 0.00000000  | -1.40920100 | -1.17124600 |
| C | 1.22002000  | -0.70463800 | -1.16936800 |
| C | 1.22002000  | 0.70463800  | -1.16936800 |
| C | 0.00000000  | 1.40920100  | -1.17124600 |
| H | -2.16337100 | 1.24967400  | -1.16758100 |
| H | -2.16337100 | -1.24967400 | -1.16758100 |
| H | 0.00000000  | -2.49837100 | -1.16592600 |
| H | 2.16337100  | -1.24967400 | -1.16758100 |
| H | 2.16337100  | 1.24967400  | -1.16758100 |
| H | 0.00000000  | 2.49837100  | -1.16592600 |

**Table S9.** B971/6-31G(d)-DCP optimized coordinates (Å) for  $C_{6v}$ -symmetry  $C_6H_6 \cdot CO_2$  dimer.

|   |             |             |             |
|---|-------------|-------------|-------------|
| C | 0.00000000  | 1.40846500  | -1.55207600 |
| C | 1.21976700  | 0.70423300  | -1.55207600 |
| C | 1.21976700  | -0.70423300 | -1.55207600 |
| C | 0.00000000  | -1.40846500 | -1.55207600 |
| C | -1.21976700 | -0.70423300 | -1.55207600 |
| C | -1.21976700 | 0.70423300  | -1.55207600 |
| H | 0.00000000  | 2.49809200  | -1.55275500 |
| H | 2.16341100  | 1.24904600  | -1.55275500 |
| H | 2.16341100  | -1.24904600 | -1.55275500 |
| H | 0.00000000  | -2.49809200 | -1.55275500 |
| H | -2.16341100 | -1.24904600 | -1.55275500 |
| H | -2.16341100 | 1.24904600  | -1.55275500 |
| O | 0.00000000  | 0.00000000  | 1.79103300  |
| C | 0.00000000  | 0.00000000  | 2.96245000  |
| O | 0.00000000  | 0.00000000  | 4.13603500  |

**Table S10.** B971/6-31G(d)-DCP optimized coordinates (Å) for  $C_1$ -symmetry  $C_5NH_5 \cdot CO_2$  dimer.

|   |             |             |             |
|---|-------------|-------------|-------------|
| C | 0.02442500  | -0.05966400 | 0.02218200  |
| O | 0.02303000  | 0.34496000  | 1.11240300  |
| O | 0.03856600  | -0.46317900 | -1.07036600 |
| C | -3.42667000 | -0.97239200 | 0.80659800  |
| C | -3.30669800 | -0.29505300 | -0.41693500 |
| C | -3.22548700 | 1.10461000  | -0.39866600 |
| C | -3.26397700 | 1.75990900  | 0.83902200  |
| C | -3.38615100 | 0.98422000  | 2.00236800  |
| H | -3.49409600 | -2.05719700 | 0.82955500  |
| H | -3.27648500 | -0.84860400 | -1.34881300 |
| H | -3.13432100 | 1.66676100  | -1.32258900 |
| H | -3.20346600 | 2.84057200  | 0.90635800  |
| H | -3.41871200 | 1.45982400  | 2.97899000  |
| N | -3.46835700 | -0.35469200 | 1.99710900  |

**Table S11.** B971/6-31G(d)-DCP optimized coordinates (Å) for  $C_s$ -symmetry  $C_5NH_5 \cdot CO_2$  dimer.

|   |             |             |             |
|---|-------------|-------------|-------------|
| C | 2.25454600  | -0.02818200 | 0.00000000  |
| O | 2.25454600  | -1.20033000 | 0.00000000  |
| O | 2.25454600  | 1.14396700  | 0.00000000  |
| C | -1.18095300 | 1.38948000  | 0.00000000  |
| C | -1.18095300 | 0.68191900  | 1.22993100  |
| C | -1.18095300 | 0.68191900  | -1.22993100 |
| C | -1.18095300 | -0.70225200 | 1.16752400  |
| C | -1.18095300 | -0.70225200 | -1.16752400 |
| N | -1.18095300 | -1.39256000 | 0.00000000  |
| H | -1.18095300 | 2.47896900  | 0.00000000  |
| H | -1.18095300 | 1.21148400  | 2.18088700  |
| H | -1.18095300 | 1.21148400  | -2.18088700 |
| H | -1.18095300 | -1.31345400 | 2.07138200  |
| H | -1.18095300 | -1.31345400 | -2.07138200 |

**Table S12.** B971/6-31G(d)-DCP optimized coordinates (Å) for  $C_1$ -symmetry  $C_5NH_5 \cdot CO_2$  dimer.

|   |             |             |             |
|---|-------------|-------------|-------------|
| C | 2.24904200  | 0.01151800  | 0.01095100  |
| O | 2.26449000  | -1.15834000 | -0.06057400 |
| O | 2.23462900  | 1.18138800  | 0.08249300  |
| C | -1.20569800 | 0.60606800  | 1.22819600  |
| C | -1.18773500 | -0.80401500 | 1.14410100  |
| C | -1.19535500 | 1.38838800  | 0.04120600  |
| C | -1.16009600 | -1.37171200 | -0.12756500 |
| C | -1.16750100 | 0.71405800  | -1.16735400 |
| N | -1.15001500 | -0.62865200 | -1.27119100 |
| H | -1.22827200 | 1.09676700  | 2.20091400  |
| H | -1.19580300 | -1.42034200 | 2.04110100  |
| H | -1.20987700 | 2.47577100  | 0.08502600  |
| H | -1.14540200 | -2.45387200 | -0.26486700 |
| H | -1.15943400 | 1.25201300  | -2.11639400 |

**Table S13.** B971/6-31G(d)-DCP optimized coordinates (Å) for  $C_s$ -symmetry  $C_5NH_5 \cdot CO_2$  dimer.

|   |             |             |             |
|---|-------------|-------------|-------------|
| N | 1.43040895  | -1.52615510 | 0.00000000  |
| C | 0.72822434  | -1.53049806 | 1.14968524  |
| C | -0.67770269 | -1.53920699 | 1.20857751  |
| C | -1.39599705 | -1.54366406 | 0.00000000  |
| C | -0.67770269 | -1.53920699 | -1.20857751 |
| C | 0.72822434  | -1.53049806 | -1.14968524 |
| H | 1.31921786  | -1.52683025 | 2.06735854  |
| H | -1.19042119 | -1.54237612 | 2.16926324  |
| H | -2.48562905 | -1.55041404 | 0.00000000  |
| H | -1.19042119 | -1.54237612 | -2.16926324 |
| H | 1.31921786  | -1.52683025 | -2.06735854 |
| O | 0.00547199  | 1.75808092  | 0.00000000  |
| C | -0.00178999 | 2.93047492  | 0.00000000  |
| O | -0.00905297 | 4.10286792  | 0.00000000  |

**Table S14.** B971/6-31G(d)-DCP optimized coordinates (Å) for  $C_1$ -symmetry  $C_3N_3H_3 \cdot CO_2$  dimer.

|   |            |             |             |
|---|------------|-------------|-------------|
| C | 3.02285900 | -0.79713000 | -0.16369600 |
| C | 3.05174800 | -3.04722900 | -0.26070200 |
| C | 4.95201500 | -1.91414200 | 0.17034100  |
| N | 2.32137000 | -1.92471300 | -0.36633600 |
| N | 4.33746000 | -0.72022800 | 0.10797200  |
| N | 4.36820600 | -3.11359500 | 0.00462400  |
| H | 2.52859900 | -3.99301400 | -0.40484000 |
| H | 6.02179800 | -1.90950400 | 0.38192300  |
| H | 2.47548300 | 0.14383300  | -0.22635800 |
| C | 4.15362200 | -2.02801500 | 3.38884500  |
| O | 5.30300400 | -2.02404400 | 3.61823700  |
| O | 3.00390400 | -2.03202200 | 3.15939800  |

**Table S15.** B971/6-31G(d)-DCP optimized coordinates (Å) for  $C_s$ -symmetry  $C_3N_3H_3 \cdot CO_2$  dimer.

|   |            |             |            |
|---|------------|-------------|------------|
| C | 2.28604200 | 0.00019300  | 0.00000000 |
| O | 2.28604200 | -1.17202000 | 0.00000000 |
| O | 2.28604200 | 1.17240500  | 0.00000000 |



|   |             |             |             |
|---|-------------|-------------|-------------|
| C | -1.19755600 | 1.30141500  | 0.00000000  |
| N | -1.19751800 | 0.69155700  | 1.19815500  |
| N | -1.19751800 | 0.69155700  | -1.19815500 |
| C | -1.19755600 | -0.65091700 | 1.12660400  |
| C | -1.19755600 | -0.65091700 | -1.12660400 |
| N | -1.19751800 | -1.38312300 | 0.00000000  |
| H | -1.19439100 | 2.39158000  | 0.00000000  |
| H | -1.19732300 | -1.19662300 | 2.07070000  |
| H | -1.19732300 | -1.19662300 | -2.07070000 |

**Table S16.** B971/6-31G(d)-DCP optimized coordinates (Å) for  $C_{3v}$ -symmetry  $C_3N_3H_3 \cdot CO_2$  dimer.

|   |             |             |             |
|---|-------------|-------------|-------------|
| N | 1.49014200  | -1.36534600 | 0.21734100  |
| C | 1.56741500  | -0.69022700 | -0.94176600 |
| N | 1.56479200  | 0.64597300  | -1.08247900 |
| C | 1.46887100  | 1.31438900  | 0.07905000  |
| N | 1.38452900  | 0.76748900  | 1.30341300  |
| C | 1.39921600  | -0.57605800 | 1.30083600  |
| H | 1.64172300  | -1.28280700 | -1.85434700 |
| H | 1.46069100  | 2.40354200  | 0.02298200  |
| H | 1.33382100  | -1.07252600 | 2.26969200  |
| O | -1.65897100 | -0.01740500 | -0.14854100 |
| C | -2.82408200 | -0.03060700 | -0.27885800 |
| O | -3.98865300 | -0.04384700 | -0.40918700 |

**Table S17.** B971/6-31G(d)-DCP optimized coordinates (Å) for  $CO_2$  bound to the exterior wall of [6,6]-SWNT.

|   |             |             |            |
|---|-------------|-------------|------------|
| C | -5.99867800 | -4.60484600 | 0.66310100 |
| C | -1.05497900 | -4.30445300 | 0.69046400 |
| C | -2.31176100 | -4.15608900 | 1.38987500 |
| C | -3.55424600 | -4.39698000 | 0.69841700 |
| C | -4.82137400 | -3.58597600 | 2.66948600 |
| C | -4.79600300 | -4.30174800 | 1.40615700 |
| C | -6.05138700 | -3.12516600 | 3.27433800 |
| C | 3.92419500  | -4.12972000 | 0.69877200 |
| C | 2.66752800  | -3.97805100 | 1.39015100 |
| C | 1.42467700  | -4.21596900 | 0.69066300 |
| C | 0.15333200  | -3.37737100 | 2.64769300 |
| C | 0.17871600  | -4.08956100 | 1.39146700 |
| C | -1.10498700 | -2.90738100 | 3.15331400 |
| C | -2.33675600 | -3.45384600 | 2.62888600 |
| C | -3.64871800 | -1.75613300 | 3.88294100 |
| C | -3.60392400 | -3.00557500 | 3.15176600 |
| C | -4.90999400 | -1.11814400 | 4.11453500 |
| C | -6.09406800 | -1.93532600 | 3.97074300 |
| C | 6.37723000  | -4.16233800 | 0.66378300 |
| C | 5.13018000  | -3.22954900 | 2.66962600 |
| C | 5.15585600  | -3.94621400 | 1.40649200 |
| C | 3.87435000  | -2.73756900 | 3.15173900 |
| C | 2.64246700  | -3.27562400 | 2.62902200 |
| C | 1.33055900  | -1.58299200 | 3.87629000 |
| C | 1.37469800  | -2.81872600 | 3.15337400 |
| C | 0.06590700  | -0.93525400 | 4.07770000 |
| C | -1.14919200 | -1.67184600 | 3.87629900 |
| C | -2.47559100 | 0.40882300  | 4.06725100 |

|   |             |             |             |
|---|-------------|-------------|-------------|
| C | -2.42428500 | -1.01441100 | 4.05737900  |
| C | -3.75028100 | 1.06296600  | 3.90154700  |
| C | -4.96239000 | 0.33294100  | 4.12352100  |
| C | -6.24494100 | 2.26270100  | 3.30568700  |
| C | -6.20232000 | 1.06424700  | 3.98714000  |
| C | 6.28169400  | -1.49045100 | 3.96867200  |
| C | 6.32414900  | -2.68069200 | 3.27276900  |
| C | 5.04198400  | -0.76084100 | 4.11363400  |
| C | 3.82979300  | -1.48781600 | 3.88229100  |
| C | 2.50403100  | 0.58732300  | 4.06632800  |
| C | 2.55520300  | -0.83586300 | 4.05690000  |
| C | 1.22893100  | 1.24713300  | 3.89527000  |
| C | 0.01405200  | 0.50789700  | 4.08759100  |
| C | -1.29537900 | 2.40268000  | 3.18837400  |
| C | -1.25091500 | 1.15823400  | 3.89567600  |
| C | -2.56353500 | 2.86560700  | 2.67003200  |
| C | -3.79520000 | 2.32171200  | 3.18648400  |
| C | -5.07657100 | 3.55104800  | 1.45509500  |
| C | -5.05089100 | 2.81912200  | 2.70927200  |
| C | -6.29800100 | 3.77836600  | 0.71550300  |
| C | 6.17368000  | 1.50921300  | 3.98864600  |
| C | 4.98972700  | 0.69045900  | 4.12319500  |
| C | 3.68313600  | 2.58992900  | 3.18533700  |
| C | 3.72840400  | 1.33131200  | 3.90049500  |
| C | 2.41555800  | 3.04465400  | 2.66891800  |
| C | 1.18440300  | 2.49195300  | 3.18806400  |
| C | -0.09969900 | 3.69311300  | 1.44057100  |
| C | -0.07411900 | 2.96758400  | 2.68904300  |
| C | -1.34625300 | 3.82416400  | 0.74196600  |
| C | -2.58933700 | 3.58085300  | 1.43868000  |
| C | -3.84547000 | 3.75069500  | -0.69830800 |
| C | -3.84527200 | 3.74194300  | 0.74927800  |
| C | -5.07696000 | 3.56927200  | -1.40632000 |
| C | -6.29817600 | 3.78722600  | -0.66359000 |
| C | 6.13050000  | 2.70792200  | 3.30742500  |
| C | 4.87373200  | 3.90880300  | 1.45559400  |
| C | 4.90010400  | 3.17657600  | 2.70969400  |
| C | 3.63172000  | 4.01241200  | 0.74971500  |
| C | 2.38966600  | 3.76191700  | 1.43860500  |
| C | 1.13257800  | 3.92640400  | -0.69006400 |
| C | -0.10013500 | 3.71031600  | -1.39132400 |
| C | -2.56438000 | 2.89822200  | -2.63015600 |
| C | -2.58977300 | 3.59824700  | -1.39000300 |
| C | -3.79625400 | 2.36114900  | -3.15313900 |
| C | -5.05173500 | 2.85275200  | -2.66943700 |
| C | -6.20360200 | 1.11398100  | -3.96879000 |
| C | -6.24597700 | 2.30386000  | -3.27240600 |
| C | 6.07563100  | 4.23078900  | -0.66317200 |
| C | 6.07593100  | 4.22197500  | 0.71616200  |
| C | 4.87311800  | 3.92711500  | -1.40603700 |
| C | 3.63138800  | 4.02168800  | -0.69834700 |
| C | 2.41444100  | 3.07773600  | -2.62877900 |
| C | 2.38900300  | 3.78024800  | -1.38984400 |
| C | 1.18325200  | 2.53133400  | -3.15431600 |
| C | -0.07511600 | 3.00008000  | -2.64846400 |
| C | -1.25223500 | 1.20649000  | -3.87780200 |
| C | -1.29649600 | 2.44194000  | -3.15480600 |

|   |             |             |             |
|---|-------------|-------------|-------------|
| C | -2.47699100 | 0.45943600  | -4.05846100 |
| C | -3.75157900 | 1.11143500  | -3.88392900 |
| C | -4.91145300 | -1.06670900 | -4.12425600 |
| C | -4.96379200 | 0.38437700  | -4.11475400 |
| C | -6.09550900 | -1.88557600 | -3.99016500 |
| C | 6.12914800  | 2.74946000  | -3.27318700 |
| C | 4.89896600  | 3.21052400  | -2.66913700 |
| C | 3.72693500  | 1.37998100  | -3.88211600 |
| C | 3.68182500  | 2.62969400  | -3.15145900 |
| C | 2.50261600  | 0.63803600  | -4.05697300 |
| C | 1.22757300  | 1.29547700  | -3.87704500 |
| C | 0.06451200  | -0.88442000 | -4.08704700 |
| C | 0.01263800  | 0.55874100  | -4.07845900 |
| C | -1.15053000 | -1.62351100 | -3.89453000 |
| C | -2.42569900 | -0.96381800 | -4.06683000 |
| C | -3.60505200 | -2.96606300 | -3.18562000 |
| C | -3.65010000 | -1.70763700 | -3.90119900 |
| C | -4.82232600 | -3.55238300 | -2.71011500 |
| C | -6.05256500 | -3.08399000 | -3.30862400 |
| C | 6.17214400  | 1.55922200  | -3.96911400 |
| C | 5.04058200  | -0.70920500 | -4.12213100 |
| C | 4.98823600  | 0.74208200  | -4.11329600 |
| C | 3.82850200  | -1.43920400 | -3.89972400 |
| C | 2.55383100  | -0.78517800 | -4.06576800 |
| C | 1.37363100  | -2.77921800 | -3.18668900 |
| C | 1.32925900  | -1.53460900 | -3.89421500 |
| C | 0.15241600  | -3.34407400 | -2.68752800 |
| C | -1.10608700 | -2.86793500 | -3.18691700 |
| C | -2.31224500 | -4.13829500 | -1.43858000 |
| C | -2.33768500 | -3.42077900 | -2.66879800 |
| C | -3.55448600 | -4.38782800 | -0.74975900 |
| C | -4.79649000 | -4.28380000 | -1.45579300 |
| C | -5.99890900 | -4.59619400 | -0.71617900 |
| C | 6.32308000  | -2.63936000 | -3.30570200 |
| C | 6.28040100  | -1.44049400 | -3.98659200 |
| C | 5.12929100  | -3.19580800 | -2.70916800 |
| C | 3.87330400  | -2.69798200 | -3.18481800 |
| C | 2.66706700  | -3.96020400 | -1.43832700 |
| C | 2.64158200  | -3.24248700 | -2.66839500 |
| C | 1.42443800  | -4.20690200 | -0.74149100 |
| C | 0.17824200  | -4.07175100 | -1.44021100 |
| C | -1.05522100 | -4.29539500 | -0.74155300 |
| C | 6.37700200  | -4.15360200 | -0.71552200 |
| C | 5.15539100  | -3.92812100 | -1.45504500 |
| C | 3.92395300  | -4.12051000 | -0.74932600 |
| H | -7.13675800 | 0.66811600  | -4.30706100 |
| H | -7.21144400 | 2.76680300  | -3.07862700 |
| H | -7.24874800 | 3.84340900  | -1.19014000 |
| H | -7.24845500 | 3.82780000  | 1.24293300  |
| H | -7.21048100 | 2.72797200  | 3.11795400  |
| H | -7.13534800 | 0.61407800  | 4.32001400  |
| H | -7.05624700 | -1.55836500 | 4.31149500  |
| H | -6.98098900 | -3.65734900 | 3.08285700  |
| H | -6.94325600 | -4.72680000 | 1.18928400  |
| H | -6.94365900 | -4.71153600 | -1.24356000 |
| H | -6.98209600 | -3.61848100 | -3.12332700 |
| H | -7.05784600 | -1.50440600 | -4.32574000 |

|   |             |             |             |
|---|-------------|-------------|-------------|
| H | 7.02061800  | 4.33787800  | 1.24351700  |
| H | 7.02010700  | 4.35335500  | -1.18938700 |
| H | 7.05873800  | 3.28151500  | -3.08134400 |
| H | 7.13458900  | 1.18209500  | -4.30893700 |
| H | 7.21338300  | -0.99030800 | -4.31956400 |
| H | 7.28869100  | -3.10478500 | -3.11865500 |
| H | 7.32771900  | -4.20051100 | -1.24272700 |
| H | 7.32812400  | -4.21581500 | 1.19004900  |
| H | 7.28967700  | -3.14381400 | 3.07966500  |
| H | 7.21477500  | -1.04461100 | 4.30716600  |
| H | 7.13624400  | 1.12787500  | 4.32337500  |
| H | 7.06006000  | 3.24218900  | 3.12168900  |
| C | 1.13283300  | 3.91847100  | 0.74174300  |
| C | -1.34639600 | 3.83161500  | -0.69042300 |
| C | -1.44791900 | 6.97778500  | -0.00232200 |
| O | -0.27718800 | 7.03348100  | -0.02306400 |
| O | -2.61955600 | 6.94190200  | 0.01986400  |

**Table S18.** B971/6-31G(d)-DCP optimized coordinates (Å) for CO<sub>2</sub> bound to the interior wall of [6,6]-SWNT.

|   |             |            |             |
|---|-------------|------------|-------------|
| C | 6.08619200  | 1.17549600 | -4.22931700 |
| C | 1.14053700  | 1.18657400 | -3.97629300 |
| C | 2.39765900  | 1.85604200 | -3.72810200 |
| C | 3.64030400  | 1.19510500 | -4.04190200 |
| C | 4.90498400  | 3.04392500 | -2.97821900 |
| C | 4.88300600  | 1.87978000 | -3.84624400 |
| C | 6.13137600  | 3.58258200 | -2.43412200 |
| C | -3.84115700 | 1.19672400 | -3.85691400 |
| C | -2.58413200 | 1.85762400 | -3.60591900 |
| C | -1.34079600 | 1.18742000 | -3.91545300 |
| C | -0.07156600 | 3.01765500 | -2.82540700 |
| C | -0.09355900 | 1.86024200 | -3.68848300 |
| C | 1.18296900  | 3.45677700 | -2.28412800 |
| C | 2.41893100  | 2.99736500 | -2.87716500 |
| C | 3.71540300  | 4.03168200 | -1.02740600 |
| C | 3.68260100  | 3.45643600 | -2.35565300 |
| C | 4.97018100  | 4.17974900 | -0.35276700 |
| C | 6.16284000  | 4.13050600 | -1.16879900 |
| C | -6.29333700 | 1.17751700 | -3.92216800 |
| C | -5.05096300 | 3.04584200 | -2.73182500 |
| C | -5.07242600 | 1.88186500 | -3.60010500 |
| C | -3.79917100 | 3.45848400 | -2.17080900 |
| C | -2.56271700 | 2.99929900 | -2.75479900 |
| C | -1.26534800 | 4.02591600 | -0.90921400 |
| C | -1.29814400 | 3.45739100 | -2.22316700 |
| C | -0.00690900 | 4.14152800 | -0.22821300 |
| C | 1.21551700  | 4.02563600 | -0.97084800 |
| C | 2.51850300  | 3.95252100 | 1.13057700  |
| C | 2.48330700  | 4.11985600 | -0.28278300 |
| C | 3.78539700  | 3.69981700 | 1.77124900  |
| C | 5.00617800  | 4.00839700 | 1.08888200  |
| C | 6.26526200  | 2.94932700 | 2.91337600  |
| C | 6.23724200  | 3.77724400 | 1.81065600  |
| C | -6.21737700 | 4.12869200 | -0.86004800 |
| C | -6.24879400 | 3.58339100 | -2.12631400 |
| C | -4.98569700 | 4.17769000 | -0.10444300 |

|   |             |             |             |
|---|-------------|-------------|-------------|
| C | -3.76619100 | 4.03210800  | -0.84152200 |
| C | -2.46298400 | 3.94987400  | 1.25410400  |
| C | -2.49834100 | 4.11969900  | -0.15926400 |
| C | -1.19534800 | 3.69009100  | 1.89933800  |
| C | 0.02893200  | 3.97122500  | 1.20512400  |
| C | 1.31455000  | 2.83333700  | 2.98291000  |
| C | 1.28566300  | 3.69395100  | 1.83952300  |
| C | 2.57551600  | 2.25501200  | 3.38932900  |
| C | 3.81480200  | 2.83017100  | 2.92818400  |
| C | 5.07868200  | 0.95582200  | 3.94677600  |
| C | 5.06401400  | 2.29125800  | 3.37611600  |
| C | 6.29517700  | 0.18804900  | 4.09319900  |
| C | -6.14270400 | 3.77213300  | 2.11939800  |
| C | -4.94947900 | 4.00453600  | 1.33702200  |
| C | -3.66664700 | 2.82737400  | 3.11524800  |
| C | -3.69607900 | 3.69661400  | 1.95771000  |
| C | -2.40570500 | 2.25222400  | 3.51384700  |
| C | -1.16652100 | 2.82935700  | 3.04275300  |
| C | 0.10008200  | 0.94311300  | 4.03176000  |
| C | 0.08596300  | 2.27090200  | 3.46559000  |
| C | 1.34304400  | 0.22828900  | 4.09205500  |
| C | 2.59000800  | 0.94554500  | 3.94779400  |
| C | 3.83907000  | -1.20141100 | 3.86334200  |
| C | 3.84307700  | 0.23664700  | 4.03598200  |
| C | 5.07077300  | -1.88627800 | 3.60640400  |
| C | 6.29145700  | -1.18157300 | 3.92900200  |
| C | -6.11499300 | 2.94477700  | 3.22256800  |
| C | -4.87691200 | 0.95290000  | 4.19785100  |
| C | -4.89158900 | 2.28777400  | 3.62545400  |
| C | -3.63800200 | 0.23413300  | 4.22555000  |
| C | -2.39131700 | 0.94349000  | 4.07414600  |
| C | -1.14214400 | -1.19432500 | 3.98553300  |
| C | 0.09177300  | -1.86745400 | 3.69678900  |
| C | 2.56085800  | -3.00490200 | 2.76211100  |
| C | 2.58231400  | -1.86299900 | 3.61238200  |
| C | 3.79698600  | -3.46389800 | 2.17790200  |
| C | 5.04899600  | -3.05063600 | 2.73818900  |
| C | 6.21490100  | -4.13518200 | 0.86674900  |
| C | 6.24691500  | -3.58830000 | 2.13255100  |
| C | -6.08782400 | -1.18479900 | 4.24281800  |
| C | -6.08430600 | 0.18486700  | 4.40601000  |
| C | -4.88463500 | -1.88896000 | 3.85928400  |
| C | -3.64188200 | -1.20390400 | 4.05355500  |
| C | -2.42036700 | -3.00583600 | 2.88839800  |
| C | -2.39902500 | -1.86443700 | 3.73885400  |
| C | -1.18469500 | -3.46525500 | 2.29551700  |
| C | 0.06984200  | -3.02541300 | 2.83506400  |
| C | 1.26300100  | -4.03198800 | 0.91848200  |
| C | 1.29617400  | -3.46342600 | 2.23186600  |
| C | 2.49539800  | -4.12661300 | 0.16782600  |
| C | 3.76354500  | -4.03875300 | 0.84935700  |
| C | 4.94603100  | -4.01415400 | -1.32969000 |
| C | 4.98270400  | -4.18542200 | 0.11198500  |
| C | 6.13912300  | -3.78285300 | -2.11278400 |
| C | -6.13325000 | -3.59033800 | 2.44663700  |
| C | -4.90651100 | -3.05272500 | 2.99080400  |
| C | -3.71802000 | -4.03796500 | 1.03894900  |

|   |             |             |             |
|---|-------------|-------------|-------------|
| C | -3.68436600 | -3.46446600 | 2.36760900  |
| C | -2.48607600 | -4.12556700 | 0.29438200  |
| C | -1.21794600 | -4.03293300 | 0.98207200  |
| C | -0.03213300 | -3.97573800 | -1.19432300 |
| C | 0.00412400  | -4.14745200 | 0.23881400  |
| C | 1.19187600  | -3.69742100 | -1.89060500 |
| C | 2.45969000  | -3.95810100 | -1.24568000 |
| C | 3.66356100  | -2.83669400 | -3.10787200 |
| C | 3.69260400  | -3.70599100 | -1.95025500 |
| C | 4.88849800  | -2.29703900 | -3.61737800 |
| C | 6.11140600  | -2.95508300 | -3.21544700 |
| C | -6.16529000 | -4.13622500 | 1.18052500  |
| C | -5.00941300 | -4.01147400 | -1.07706100 |
| C | -4.97292400 | -4.18452700 | 0.36436200  |
| C | -3.78885500 | -3.70262900 | -1.75965600 |
| C | -2.52210300 | -3.95562500 | -1.11863200 |
| C | -1.31818800 | -2.83658800 | -2.97182800 |
| C | -1.28924400 | -3.69603300 | -1.82734900 |
| C | -0.08897700 | -2.27720500 | -3.45742300 |
| C | 1.16322700  | -2.83780000 | -3.03536600 |
| C | 2.38903200  | -0.95168700 | -4.06601100 |
| C | 2.40281500  | -2.26102200 | -3.50668300 |
| C | 3.63601400  | -0.24258300 | -4.21538300 |
| C | 4.87438400  | -0.96156900 | -4.18765100 |
| C | 6.08206700  | -0.19397600 | -4.39378400 |
| C | -6.26848300 | -2.95163800 | -2.90136700 |
| C | -6.24058100 | -3.77954400 | -1.79867600 |
| C | -5.06728500 | -2.29426600 | -3.36502900 |
| C | -3.81836900 | -2.83342500 | -2.91712700 |
| C | -2.59307200 | -0.95038900 | -3.94038700 |
| C | -2.57925900 | -2.25889100 | -3.37957100 |
| C | -1.34552400 | -0.23435300 | -4.08570400 |
| C | -0.10276600 | -0.94971300 | -4.02510400 |
| C | 1.13589500  | -0.23490600 | -4.14768500 |
| C | -6.29744000 | -0.19208900 | -4.08476000 |
| C | -5.08131700 | -0.95977600 | -3.93743900 |
| C | -3.84574000 | -0.24127700 | -4.02838600 |
| H | 7.15163400  | -4.42127200 | 0.39290000  |
| H | 7.20795700  | -3.45755900 | 2.62584900  |
| H | 7.23999000  | -1.71481700 | 3.92911200  |
| H | 7.24667000  | 0.70064000  | 4.21885500  |
| H | 7.22508800  | 2.70176800  | 3.36212300  |
| H | 7.17569100  | 4.16214000  | 1.41690300  |
| H | 7.12188600  | 4.41884800  | -0.74337100 |
| H | 7.06642100  | 3.45258500  | -2.97515300 |
| H | 7.03346600  | 1.70887900  | -4.27544400 |
| H | 7.02628900  | -0.70618400 | -4.56622400 |
| H | 7.04755100  | -2.70765600 | -3.71164600 |
| H | 7.09629100  | -4.16774300 | -1.76720200 |
| H | -7.02846300 | 0.69715600  | 4.57916500  |
| H | -7.03485200 | -1.71843200 | 4.29082800  |
| H | -7.06792400 | -3.46035200 | 2.98827000  |
| H | -7.12454900 | -4.42325900 | 0.75485100  |
| H | -7.17908900 | -4.16415200 | -1.40489400 |
| H | -7.22848600 | -2.70406600 | -3.34945500 |
| H | -7.24908100 | -0.70448500 | -4.20904000 |
| H | -7.24148700 | 1.71120900  | -3.92229800 |

|   |             |             |             |
|---|-------------|-------------|-------------|
| H | -7.20959400 | 3.45412800  | -2.62021800 |
| H | -7.15424200 | 4.41489900  | -0.38656200 |
| H | -7.10008100 | 4.15566600  | 1.77300000  |
| H | -7.05101400 | 2.69605900  | 3.71852800  |
| C | -1.13791800 | 0.22720300  | 4.15544900  |
| C | 1.33877100  | -1.19343000 | 3.92221800  |
| C | 0.01441000  | 0.06277200  | 0.31198600  |
| O | -0.97821500 | -0.56173400 | 0.30605300  |
| O | 1.00784900  | 0.68546800  | 0.31611000  |

**Table S19.** B971/6-31G(d)-DCP optimized coordinates (Å) for CO<sub>2</sub> bound to the exterior wall of [6,6]-N-SWNT.

|   |             |            |             |
|---|-------------|------------|-------------|
| C | 6.07978000  | 1.19804500 | -4.30858200 |
| C | 1.13957900  | 1.19543300 | -4.01952800 |
| C | 2.39341300  | 1.86788500 | -3.78007200 |
| C | 3.63802400  | 1.20884300 | -4.09973100 |
| C | 4.90509100  | 3.06172500 | -3.04368300 |
| C | 4.87933200  | 1.89837100 | -3.91929900 |
| C | 6.13126500  | 3.59107000 | -2.50108700 |
| C | -3.84187900 | 1.19169600 | -3.86887600 |
| C | -2.58540500 | 1.85503300 | -3.62041800 |
| C | -1.34256400 | 1.19016000 | -3.94090200 |
| C | -0.07071200 | 3.01992300 | -2.85305500 |
| C | -0.09576800 | 1.86565000 | -3.71893500 |
| C | 1.18612700  | 3.46438800 | -2.32526000 |
| C | 2.41770100  | 3.00912200 | -2.92589600 |
| C | 3.72918700  | 4.02483000 | -1.07387300 |
| C | 3.68622000  | 3.46431400 | -2.40757600 |
| C | 4.98671500  | 4.16655300 | -0.40520800 |
| C | 6.17084500  | 4.12326500 | -1.22565700 |
| C | -6.29227500 | 1.16771500 | -3.92981600 |
| C | -5.05366100 | 3.02070800 | -2.71182400 |
| C | -5.07523500 | 1.87072200 | -3.60186700 |
| C | -3.79947200 | 3.43242300 | -2.15645700 |
| C | -2.56363200 | 2.98939500 | -2.75819000 |
| C | -1.25758000 | 4.00642100 | -0.91991300 |
| C | -1.29840600 | 3.45118800 | -2.23615900 |
| C | 0.00922300  | 4.13030500 | -0.25281200 |
| C | 1.22849200  | 4.02902600 | -1.00464700 |
| C | 2.54100700  | 3.93486900 | 1.09034300  |
| C | 2.49683300  | 4.11476600 | -0.32370700 |
| C | 3.81060000  | 3.66925300 | 1.72604800  |
| C | 5.03164700  | 3.97741400 | 1.04280900  |
| C | 6.28200200  | 2.90776000 | 2.87189000  |
| C | 6.25650500  | 3.72812400 | 1.75453000  |
| C | -6.20981800 | 4.06341200 | -0.80953500 |
| C | -6.24868700 | 3.53572300 | -2.08483100 |
| C | -4.97228000 | 4.12206000 | -0.06769400 |
| C | -3.75935200 | 3.99067800 | -0.82095500 |
| C | -2.43685000 | 3.90582700 | 1.25550400  |
| C | -2.48506600 | 4.08682900 | -0.15429900 |
| C | -1.16094900 | 3.64767100 | 1.88260000  |
| C | 0.05897500  | 3.94616700 | 1.17520400  |
| C | 1.34916400  | 2.79926200 | 2.93908100  |
| C | 1.31311300  | 3.67868600 | 1.80003200  |
| C | 2.59563900  | 2.23030200 | 3.34338000  |

|   |             |             |             |
|---|-------------|-------------|-------------|
| C | 3.84182300  | 2.80391900  | 2.88464100  |
| C | 5.08217200  | 0.94829900  | 3.97044700  |
| C | 5.08275500  | 2.27753800  | 3.35337200  |
| C | 6.29384200  | 0.17743000  | 4.14158600  |
| C | -6.09961900 | 3.73542300  | 2.18199000  |
| C | -4.91997200 | 3.95240000  | 1.37617500  |
| C | -3.61032900 | 2.80222000  | 3.15596300  |
| C | -3.65580900 | 3.65183800  | 1.98171700  |
| C | -2.34215600 | 2.22086000  | 3.53140500  |
| C | -1.11838200 | 2.78495200  | 3.00645400  |
| C | 0.14589200  | 0.91598400  | 4.01569800  |
| C | 0.13117800  | 2.22351700  | 3.42122000  |
| C | 1.36260400  | 0.21972200  | 4.06936100  |
| C | 2.59712000  | 0.92428300  | 3.90921000  |
| C | 3.83915400  | -1.20852700 | 3.92289700  |
| C | 3.85732000  | 0.23476400  | 4.05859100  |
| C | 5.06585800  | -1.89828700 | 3.65982500  |
| C | 6.28472800  | -1.19314000 | 3.99303600  |
| C | -6.05303300 | 2.93501900  | 3.30618300  |
| C | -4.78665400 | 0.96487000  | 4.29841900  |
| C | -4.82381400 | 2.29149700  | 3.70731900  |
| C | -3.55134600 | 0.24217400  | 4.32051100  |
| C | -2.31043600 | 0.94119700  | 4.12461800  |
| C | -1.07948700 | -1.16190400 | 3.97410500  |
| C | 0.12818100  | -1.81504200 | 3.68513700  |
| C | 2.57158100  | -2.95866600 | 2.76740800  |
| C | 2.58270600  | -1.84964000 | 3.64107300  |
| C | 3.81113200  | -3.42807200 | 2.19320400  |
| C | 5.05885100  | -3.05106600 | 2.77519400  |
| C | 6.23178000  | -4.09351000 | 0.88368000  |
| C | 6.25736400  | -3.57479500 | 2.16327000  |
| C | -5.99760900 | -1.17460700 | 4.35323800  |
| C | -5.98862900 | 0.19238600  | 4.52884000  |
| C | -4.80298200 | -1.87414900 | 3.93328100  |
| C | -3.57090700 | -1.19246600 | 4.11292200  |
| C | -2.36823700 | -2.95581300 | 2.87563300  |
| C | -2.32681500 | -1.81694400 | 3.72814500  |
| C | -1.15178300 | -3.40738700 | 2.27721500  |
| C | 0.09704400  | -2.95157200 | 2.80571500  |
| C | 1.28489300  | -3.97459600 | 0.90640900  |
| C | 1.31555600  | -3.39355100 | 2.19953400  |
| C | 2.51930800  | -4.07106500 | 0.16203200  |
| C | 3.78096300  | -3.98339400 | 0.85399700  |
| C | 4.96988100  | -3.95589600 | -1.32329800 |
| C | 5.00486000  | -4.12676000 | 0.12114400  |
| C | 6.16143600  | -3.71867600 | -2.10338200 |
| C | -6.08057100 | -3.53119200 | 2.48149200  |
| C | -4.85028600 | -3.02242000 | 3.02398900  |
| C | -3.68739700 | -3.99062500 | 1.04557100  |
| C | -3.64334500 | -3.41705700 | 2.37254200  |
| C | -2.45977500 | -4.09312000 | 0.29102100  |
| C | -1.18999900 | -4.00073200 | 0.96646700  |
| C | -0.01357400 | -3.95440200 | -1.20901700 |
| C | 0.02307900  | -4.10787700 | 0.22307900  |
| C | 1.21230000  | -3.67077600 | -1.90296300 |
| C | 2.48228500  | -3.91859200 | -1.25164300 |
| C | 3.68033500  | -2.80835600 | -3.12154100 |



|   |             |             |             |
|---|-------------|-------------|-------------|
| C | 3.71545600  | -3.66140400 | -1.95190000 |
| C | 4.90238800  | -2.27029600 | -3.63925400 |
| C | 6.12862000  | -2.90922900 | -3.22150900 |
| C | -6.12778200 | -4.07037700 | 1.20507900  |
| C | -4.99154600 | -3.98674500 | -1.06899600 |
| C | -4.94915500 | -4.13985900 | 0.38328800  |
| C | -3.77490500 | -3.68562600 | -1.75997900 |
| C | -2.50101700 | -3.93886200 | -1.12605000 |
| C | -1.30661100 | -2.83397200 | -2.99667300 |
| C | -1.27464000 | -3.68901100 | -1.84247800 |
| C | -0.07992500 | -2.27096200 | -3.48088600 |
| C | 1.17892800  | -2.82525000 | -3.05501900 |
| C | 2.39308600  | -0.94181600 | -4.10319800 |
| C | 2.41419800  | -2.24622700 | -3.52966700 |
| C | 3.63742300  | -0.22973800 | -4.26256500 |
| C | 4.87964900  | -0.94379000 | -4.23535600 |
| C | 6.08019000  | -0.17492300 | -4.45937000 |
| C | -6.25436300 | -2.95015500 | -2.90340800 |
| C | -6.22182900 | -3.76275300 | -1.78529300 |
| C | -5.05869400 | -2.30100500 | -3.38047300 |
| C | -3.80718100 | -2.83159700 | -2.92817800 |
| C | -2.58657300 | -0.95176600 | -3.96695300 |
| C | -2.56834900 | -2.26039700 | -3.40152300 |
| C | -1.34422300 | -0.23304600 | -4.11569700 |
| C | -0.09798000 | -0.94661000 | -4.05402800 |
| C | 1.13824300  | -0.22900600 | -4.18491400 |
| C | -6.29281900 | -0.20224500 | -4.10558000 |
| C | -5.07655000 | -0.96616200 | -3.96211000 |
| C | -3.84317000 | -0.24479900 | -4.04962600 |
| H | 7.17099800  | -4.37071000 | 0.40946100  |
| H | 7.21638900  | -3.45875500 | 2.66426800  |
| H | 7.22998400  | -1.73165800 | 4.00345800  |
| H | 7.24598600  | 0.68711400  | 4.27431100  |
| H | 7.24514300  | 2.64491200  | 3.30465100  |
| H | 7.20135300  | 4.08076200  | 1.34606900  |
| H | 7.13477100  | 4.39682600  | -0.80112800 |
| H | 7.06512700  | 3.45960400  | -3.04387900 |
| H | 7.02547500  | 1.73350300  | -4.36413100 |
| H | 7.02623900  | -0.68442200 | -4.63093300 |
| H | 7.06518000  | -2.65650300 | -3.71437800 |
| H | 7.12301500  | -4.08257200 | -1.74696500 |
| H | -6.92771300 | 0.70634600  | 4.72247400  |
| H | -6.94286900 | -1.70942300 | 4.42028900  |
| H | -7.01421300 | -3.38190100 | 3.02001300  |
| H | -7.09785100 | -4.32485500 | 0.78302300  |
| H | -7.16079500 | -4.13354900 | -1.37901400 |
| H | -7.21795800 | -2.70324400 | -3.34444200 |
| H | -7.24391800 | -0.71601200 | -4.23010000 |
| H | -7.24298100 | 1.69708700  | -3.92135100 |
| H | -7.21446200 | 3.39814000  | -2.56673900 |
| H | -7.14602300 | 4.32733800  | -0.32162500 |
| H | -7.06328300 | 4.10900600  | 1.84211100  |
| H | -6.98128500 | 2.69911700  | 3.82284300  |
| N | -1.08651800 | 0.24756000  | 4.27976700  |
| N | 1.37693700  | -1.21664400 | 4.01350800  |
| C | -0.94631100 | -0.76973900 | 7.19101200  |
| O | -2.11478200 | -0.83422300 | 7.25867100  |

O 0.22334500 -0.70911500 7.13563800

**Table S20.** B971/6-31G(d)-DCP optimized coordinates (Å) for CO<sub>2</sub> bound to the interior wall of [6,6]-N-SWNT.

|   |             |            |             |
|---|-------------|------------|-------------|
| C | 6.08923800  | 1.20175500 | -4.28086800 |
| C | 1.14726700  | 1.20637500 | -4.02043800 |
| C | 2.40065800  | 1.87621500 | -3.77301000 |
| C | 3.64637100  | 1.21590600 | -4.08541200 |
| C | 4.91012400  | 3.06401600 | -3.01863300 |
| C | 4.88756800  | 1.90359300 | -3.89818100 |
| C | 6.13400100  | 3.58844000 | -2.46621800 |
| C | -3.83538200 | 1.20557700 | -3.89233100 |
| C | -2.57937500 | 1.86803200 | -3.63846600 |
| C | -1.33479900 | 1.20328000 | -3.95284900 |
| C | -0.06666300 | 3.02937300 | -2.85795600 |
| C | -0.08846800 | 1.87831100 | -3.72733000 |
| C | 1.18765400  | 3.46787600 | -2.32005000 |
| C | 2.42183800  | 3.01409100 | -2.91520900 |
| C | 3.72510500  | 4.01505600 | -1.04947400 |
| C | 3.68826400  | 3.46440800 | -2.38723700 |
| C | 4.97889600  | 4.15144100 | -0.37291300 |
| C | 6.16739200  | 4.11218800 | -1.18703300 |
| C | -6.28535100 | 1.18238600 | -3.96395100 |
| C | -5.05128800 | 3.03290400 | -2.73808600 |
| C | -5.06950100 | 1.88523400 | -3.63115100 |
| C | -3.79933400 | 3.44049900 | -2.17492200 |
| C | -2.56086100 | 2.99956200 | -2.77318200 |
| C | -1.26251000 | 4.00013100 | -0.92281300 |
| C | -1.29701700 | 3.45662000 | -2.24364700 |
| C | 0.00114200  | 4.11729000 | -0.24919000 |
| C | 1.22397800  | 4.02113300 | -0.99514500 |
| C | 2.52509800  | 3.91063400 | 1.10641300  |
| C | 2.48861600  | 4.10028400 | -0.30617600 |
| C | 3.79062100  | 3.64402700 | 1.74936400  |
| C | 5.01564800  | 3.95482000 | 1.07450600  |
| C | 6.25510200  | 2.88502900 | 2.91111300  |
| C | 6.23609500  | 3.70499500 | 1.79317900  |
| C | -6.21518800 | 4.06534100 | -0.83504800 |
| C | -6.24868000 | 3.54578100 | -2.11388100 |
| C | -4.98127100 | 4.11739600 | -0.08693100 |
| C | -3.76510800 | 3.98906900 | -0.83551000 |
| C | -2.45291600 | 3.88654900 | 1.24578500  |
| C | -2.49373100 | 4.07743600 | -0.16273600 |
| C | -1.18079900 | 3.62309700 | 1.87684000  |
| C | 0.04305700  | 3.92190900 | 1.17708100  |
| C | 1.32252100  | 2.77135700 | 2.94559700  |
| C | 1.29340500  | 3.65159300 | 1.80765400  |
| C | 2.56654900  | 2.20599300 | 3.36111900  |
| C | 3.81503000  | 2.77911800 | 2.90822200  |
| C | 5.04942400  | 0.92865800 | 4.00929900  |
| C | 5.05339800  | 2.25549900 | 3.38669100  |
| C | 6.26048300  | 0.15833300 | 4.18831700  |
| C | -6.11947800 | 3.72274700 | 2.15630700  |
| C | -4.93613800 | 3.93921800 | 1.35635600  |
| C | -3.63629500 | 2.78272700 | 3.13990400  |
| C | -3.67532400 | 3.63301200 | 1.96610300  |

|   |             |             |             |
|---|-------------|-------------|-------------|
| C | -2.37104300 | 2.20033400  | 3.52209100  |
| C | -1.14521600 | 2.75856600  | 2.99914300  |
| C | 0.11100100  | 0.89360400  | 4.02254700  |
| C | 0.10137700  | 2.19781800  | 3.42172800  |
| C | 1.32901800  | 0.19975200  | 4.09158800  |
| C | 2.56434200  | 0.90333200  | 3.93459400  |
| C | 3.80669100  | -1.22841200 | 3.96424400  |
| C | 3.82445600  | 0.21542900  | 4.09529900  |
| C | 5.03427400  | -1.91773900 | 3.70464700  |
| C | 6.25199000  | -1.21241000 | 4.04215500  |
| C | -6.07909900 | 2.92139000  | 3.28041400  |
| C | -4.82041800 | 0.95199500  | 4.28435700  |
| C | -4.85317100 | 2.27661300  | 3.68809800  |
| C | -3.58594600 | 0.22741200  | 4.31559000  |
| C | -2.34219600 | 0.92255600  | 4.12079700  |
| C | -1.11413400 | -1.18133000 | 3.99409100  |
| C | 0.09399500  | -1.83623400 | 3.71321600  |
| C | 2.54300000  | -2.97291400 | 2.79852600  |
| C | 2.55100300  | -1.86949500 | 3.67812100  |
| C | 3.78483800  | -3.43969500 | 2.22651100  |
| C | 5.03032400  | -3.06743400 | 2.81614800  |
| C | 6.21082400  | -4.09899200 | 0.92352600  |
| C | 6.23113500  | -3.58877200 | 2.20660000  |
| C | -6.03415500 | -1.18572800 | 4.33932400  |
| C | -6.02431500 | 0.18194900  | 4.51165800  |
| C | -4.83840500 | -1.88784600 | 3.92785200  |
| C | -3.60587800 | -1.20792700 | 4.11400600  |
| C | -2.39768700 | -2.97021200 | 2.88393500  |
| C | -2.35985900 | -1.83535700 | 3.74015600  |
| C | -1.17897600 | -3.41825000 | 2.28950000  |
| C | 0.06704200  | -2.96578400 | 2.82663700  |
| C | 1.26421600  | -3.97215100 | 0.92475300  |
| C | 1.28858100  | -3.40281400 | 2.22246100  |
| C | 2.50191300  | -4.06519300 | 0.18523800  |
| C | 3.76048200  | -3.98507300 | 0.88332900  |
| C | 4.95947500  | -3.94765400 | -1.28869100 |
| C | 4.98745500  | -4.12555200 | 0.15507600  |
| C | 6.15479200  | -3.71133600 | -2.06306700 |
| C | -6.10895500 | -3.53899300 | 2.46417000  |
| C | -4.88130200 | -3.03386200 | 3.01595600  |
| C | -3.70849000 | -3.98803700 | 1.03817600  |
| C | -3.67076500 | -3.42543300 | 2.36970900  |
| C | -2.47693300 | -4.08414400 | 0.29001600  |
| C | -1.21100500 | -3.99821400 | 0.97301500  |
| C | -0.02379600 | -3.93532300 | -1.19558600 |
| C | 0.00525200  | -4.09893600 | 0.23495900  |
| C | 1.20541100  | -3.65202900 | -1.88315500 |
| C | 2.47190800  | -3.90463600 | -1.22733700 |
| C | 3.67968100  | -2.79615900 | -3.09183200 |
| C | 3.70839900  | -3.64861600 | -1.92180700 |
| C | 4.90483700  | -2.26214900 | -3.60610100 |
| C | 6.12810600  | -2.90210100 | -3.18158500 |
| C | -6.14962400 | -4.06942400 | 1.18393900  |
| C | -5.00152800 | -3.97086600 | -1.08345100 |
| C | -4.96670300 | -4.13272200 | 0.36808300  |
| C | -3.78125100 | -3.66649000 | -1.76630000 |
| C | -2.51100200 | -3.92049900 | -1.12583000 |

|   |             |             |             |
|---|-------------|-------------|-------------|
| C | -1.30672100 | -2.81397400 | -2.98898400 |
| C | -1.28125900 | -3.66773200 | -1.83436300 |
| C | -0.07735400 | -2.25379600 | -3.46924500 |
| C | 1.17853300  | -2.80765100 | -3.03535600 |
| C | 2.39911200  | -0.93183300 | -4.08720000 |
| C | 2.41642200  | -2.23275700 | -3.50676400 |
| C | 3.64525000  | -0.22277900 | -4.24411800 |
| C | 4.88645400  | -0.93815700 | -4.20779400 |
| C | 6.08896400  | -0.17150500 | -4.42878100 |
| C | -6.25430500 | -2.93272400 | -2.92433900 |
| C | -6.22771400 | -3.74558900 | -1.80606000 |
| C | -5.05628000 | -2.28448200 | -3.39620000 |
| C | -3.80731400 | -2.81301600 | -2.93481600 |
| C | -2.58058600 | -0.93750100 | -3.97532500 |
| C | -2.56614100 | -2.24271400 | -3.40278900 |
| C | -1.33681900 | -0.22024100 | -4.12149600 |
| C | -0.09135200 | -0.93366800 | -4.05058800 |
| C | 1.14567800  | -0.21814000 | -4.17971400 |
| C | -6.28580300 | -0.18804400 | -4.13608100 |
| C | -5.07068900 | -0.95201000 | -3.98358200 |
| C | -3.83671800 | -0.23127800 | -4.06829700 |
| H | 7.15189100  | -4.37447200 | 0.45199500  |
| H | 7.18793800  | -3.47690200 | 2.71277300  |
| H | 7.19719400  | -1.75094700 | 4.05681300  |
| H | 7.21203600  | 0.66829300  | 4.32400200  |
| H | 7.21577300  | 2.62298100  | 3.34979500  |
| H | 7.18330300  | 4.05795700  | 1.39052600  |
| H | 7.12941700  | 4.38154400  | -0.75554200 |
| H | 7.07069400  | 3.45877600  | -3.00455700 |
| H | 7.03573600  | 1.73621500  | -4.33251100 |
| H | 7.03524900  | -0.68245200 | -4.59461200 |
| H | 7.06728200  | -2.65116000 | -3.67036100 |
| H | 7.11425200  | -4.07674400 | -1.70252700 |
| H | -6.96401500 | 0.69754500  | 4.69783800  |
| H | -6.98084400 | -1.71873000 | 4.40108400  |
| H | -7.04532000 | -3.39283500 | 2.99885300  |
| H | -7.11743800 | -4.32129100 | 0.75515100  |
| H | -7.16896600 | -4.11627700 | -1.40503000 |
| H | -7.21564200 | -2.68570600 | -3.37022300 |
| H | -7.23653200 | -0.70167700 | -4.26387900 |
| H | -7.23575400 | 1.71237800  | -3.96107300 |
| H | -7.21227600 | 3.41206200  | -2.60120600 |
| H | -7.15338000 | 4.32748400  | -0.34999400 |
| H | -7.08116000 | 4.09767400  | 1.81236900  |
| H | -7.01035900 | 2.68669300  | 3.79221600  |
| N | -1.12188800 | 0.22874000  | 4.27973000  |
| N | 1.34310300  | -1.23854800 | 4.05236900  |
| C | -0.41423400 | -0.01839800 | -0.08408800 |
| O | -1.27052200 | -0.42564800 | 0.60653200  |
| O | 0.44505900  | 0.38506000  | -0.77068400 |

**Table S21.** B971/6-31G(d)-DCP optimized coordinates (Å) for CO<sub>2</sub> bound to the exterior wall of [10,0]-SWNT.

|   |            |             |            |
|---|------------|-------------|------------|
| C | 6.12189500 | -2.15250700 | 3.45830300 |
| C | 6.81305500 | -3.12842100 | 2.68450000 |
| C | 4.66481200 | -2.15864000 | 3.46706500 |

|   |             |             |             |
|---|-------------|-------------|-------------|
| C | 3.95083900  | -3.12623000 | 2.68232800  |
| C | 1.79252800  | -2.15160700 | 3.46096900  |
| C | 2.50929600  | -3.12806100 | 2.68642500  |
| C | 0.35404100  | -2.15249800 | 3.46303700  |
| C | -0.36478300 | -3.12246600 | 2.68097500  |
| C | -2.52171900 | -2.14527500 | 3.45314600  |
| C | -1.80281800 | -3.12050400 | 2.67968900  |
| C | -3.96303700 | -2.14301900 | 3.44734500  |
| C | -4.68092000 | -3.11020600 | 2.66742200  |
| C | -6.82133700 | -2.16137700 | 3.48269400  |
| C | -6.13794300 | -3.11587800 | 2.67494400  |
| C | 6.12518500  | 0.25476400  | 3.95518100  |
| C | 6.81603100  | -0.99060900 | 3.90617700  |
| C | 4.66734600  | 0.25737500  | 3.96517000  |
| C | 3.95206700  | -0.98738600 | 3.89987200  |
| C | 1.79456000  | 0.25875600  | 3.96209900  |
| C | 2.51100700  | -0.98739400 | 3.90810800  |
| C | 0.35568200  | 0.26031800  | 3.96510900  |
| C | -0.36435500 | -0.98437500 | 3.90203600  |
| C | -2.52024000 | 0.26182300  | 3.95431100  |
| C | -1.80223300 | -0.98292500 | 3.90104600  |
| C | -3.96174500 | 0.26275700  | 3.94740500  |
| C | -4.68214000 | -0.97762900 | 3.88097800  |
| C | -6.82045300 | 0.26985500  | 3.99047400  |
| C | -6.13956200 | -0.97872700 | 3.89445300  |
| C | 6.12441300  | 2.49721100  | 2.94752800  |
| C | 6.81757800  | 1.45829500  | 3.63564400  |
| C | 4.66802800  | 2.50854700  | 2.95561100  |
| C | 3.95414800  | 1.45898100  | 3.63146800  |
| C | 1.79621000  | 2.50250600  | 2.94964000  |
| C | 2.51298600  | 1.46228800  | 3.63952100  |
| C | 0.35801000  | 2.50635800  | 2.95183900  |
| C | -0.36226200 | 1.46280400  | 3.63456700  |
| C | -2.51737100 | 2.50278400  | 2.94248700  |
| C | -1.80008000 | 1.46395000  | 3.63308800  |
| C | -3.95852900 | 2.50264600  | 2.93723900  |
| C | -4.67939800 | 1.46069900  | 3.61420600  |
| C | -6.81651600 | 2.53083200  | 2.96404900  |
| C | -6.13682200 | 1.46603000  | 3.62574700  |
| C | 6.12260700  | 3.72142300  | 0.81394200  |
| C | 6.81694200  | 3.27752000  | 1.97761900  |
| C | 4.66798300  | 3.73833200  | 0.81537600  |
| C | 3.95590000  | 3.28108900  | 1.97711200  |
| C | 1.79798600  | 3.72103900  | 0.81025300  |
| C | 0.36068000  | 3.72227800  | 0.81007100  |
| C | -2.51450000 | 3.71834700  | 0.80595800  |
| C | -1.79691900 | 3.28394400  | 1.97463400  |
| C | -3.95487600 | 3.71913800  | 0.80333100  |
| C | -4.67410400 | 3.27811800  | 1.96503600  |
| C | -6.81157500 | 3.75394000  | 0.80738900  |
| C | -6.13077800 | 3.28676600  | 1.96974500  |
| C | 6.12579800  | 3.45137000  | -1.63140000 |
| C | 6.81790700  | 3.77646000  | -0.42904100 |
| C | 4.67068600  | 3.46691200  | -1.63838200 |
| C | 3.95756300  | 3.78270200  | -0.43249000 |
| C | 1.79986800  | 3.45318300  | -1.63680700 |
| C | 2.51611000  | 3.78421000  | -0.43463500 |

|   |             |             |             |
|---|-------------|-------------|-------------|
| C | 0.36253000  | 3.45431500  | -1.63970500 |
| C | -0.35713200 | 3.77381600  | -0.43645300 |
| C | -2.51240500 | 3.44899300  | -1.63900400 |
| C | -1.79532500 | 3.77688000  | -0.43737100 |
| C | -3.95334800 | 3.44988300  | -1.63853300 |
| C | -4.67023000 | 3.77740800  | -0.43954200 |
| C | -6.81004800 | 3.48353100  | -1.65575900 |
| C | -6.12674200 | 3.78658100  | -0.44224700 |
| C | 6.13122500  | 1.79102400  | -3.44548000 |
| C | 6.82212500  | 2.76601100  | -2.67029200 |
| C | 4.67423100  | 1.79932400  | -3.45742500 |
| C | 3.95992300  | 2.76822900  | -2.67456600 |
| C | 1.80224300  | 1.79637100  | -3.45831600 |
| C | 2.51846500  | 2.77171200  | -2.68148200 |
| C | 0.36393100  | 1.79914400  | -3.46426700 |
| C | -0.35516700 | 2.76934300  | -2.68294300 |
| C | -2.51204200 | 1.79660400  | -3.45946100 |
| C | -1.79298100 | 2.76999000  | -2.68421800 |
| C | -3.95342600 | 1.79660500  | -3.45572400 |
| C | -4.67122000 | 2.76481200  | -2.67677500 |
| C | -6.81165900 | 1.81909500  | -3.49567600 |
| C | -6.12815100 | 2.77251800  | -2.68667200 |
| C | 6.13208700  | -0.61631900 | -3.94242900 |
| C | 6.82465900  | 0.62800800  | -3.89165000 |
| C | 4.67431000  | -0.61685800 | -3.95522900 |
| C | 3.96081900  | 0.62896300  | -3.89163800 |
| C | 1.80166900  | -0.61429100 | -3.95784100 |
| C | 2.51987100  | 0.63098800  | -3.90319300 |
| C | 0.36282100  | -0.61390600 | -3.96387400 |
| C | -0.35547300 | 0.63196300  | -3.90399600 |
| C | -2.51319700 | -0.61068100 | -3.95909800 |
| C | -1.79338700 | 0.63296800  | -3.90568600 |
| C | -3.95476400 | -0.60928600 | -3.95503900 |
| C | -4.67347500 | 0.63228300  | -3.89041900 |
| C | -6.81347000 | -0.61212100 | -4.00381200 |
| C | -6.13088900 | 0.63547700  | -3.90631700 |
| C | 6.12628000  | -2.85884200 | -2.93508300 |
| C | 6.82217800  | -1.82084900 | -3.62170200 |
| C | 4.66984300  | -2.86798900 | -2.94570400 |
| C | 3.95870400  | -1.81741600 | -3.62278800 |
| C | 1.79793100  | -2.85809400 | -2.94457500 |
| C | 2.51753000  | -1.81863800 | -3.63312400 |
| C | 0.35972100  | -2.85970700 | -2.94896600 |
| C | -0.35746300 | -1.81498500 | -3.63318900 |
| C | -2.51589400 | -2.85085600 | -2.94576400 |
| C | -1.79545800 | -1.81358300 | -3.63509300 |
| C | -3.95708400 | -2.84857800 | -2.94377500 |
| C | -4.67495000 | -1.80589800 | -3.62277700 |
| C | -6.81500800 | -2.87304400 | -2.97723800 |
| C | -6.13239900 | -1.80923300 | -3.63753900 |
| C | 6.11935900  | -4.08263000 | -0.80143500 |
| C | 6.81624500  | -3.63995000 | -1.96399300 |
| C | 4.66469100  | -4.09789500 | -0.80576800 |
| C | 3.95486200  | -3.63957000 | -1.96857500 |
| C | 1.79360300  | -4.07884500 | -0.80644900 |
| C | 2.51315300  | -3.64141700 | -1.97386100 |
| C | 0.35619500  | -4.08117400 | -0.80862800 |

|   |             |             |             |
|---|-------------|-------------|-------------|
| C | -0.36048800 | -3.63531000 | -1.97492600 |
| C | -2.51911100 | -4.06814800 | -0.80966100 |
| C | -1.79854200 | -3.63333600 | -1.97651200 |
| C | -3.95988500 | -4.06593000 | -0.81029700 |
| C | -4.67595500 | -3.62313000 | -1.97325000 |
| C | -6.81676100 | -4.09632900 | -0.82039900 |
| C | -6.13270900 | -3.62968600 | -1.98110600 |
| C | 6.11813800  | -3.81245800 | 1.64380100  |
| C | 6.81227000  | -4.13871100 | 0.44288100  |
| C | 4.66292500  | -3.82620900 | 1.64783900  |
| C | 3.95175900  | -4.14103700 | 0.44053000  |
| C | 1.79165400  | -3.80946900 | 1.64076500  |
| C | 2.50977700  | -4.14262700 | 0.43979800  |
| C | 0.35400900  | -3.81159800 | 1.64077100  |
| C | -0.36331800 | -4.13567400 | 0.43642000  |
| C | -2.52133700 | -3.79932600 | 1.63404600  |
| C | -1.80141900 | -4.13337800 | 0.43496900  |
| C | -3.96226000 | -3.79698900 | 1.63092300  |
| C | -4.67804400 | -4.12340900 | 0.43089200  |
| C | -6.81937700 | -3.82601200 | 1.64313500  |
| C | -6.13453500 | -4.12994800 | 0.43069800  |
| H | 7.90313200  | -3.11247500 | 2.66766000  |
| H | 7.90600600  | -0.98734200 | 3.88306500  |
| H | 7.90240700  | -4.11471500 | 0.44071700  |
| H | 7.90757200  | 1.44881000  | 3.61401300  |
| H | 7.90630600  | -3.61992700 | -1.94904000 |
| H | 7.90700000  | 3.25610300  | 1.96444500  |
| H | 7.91214700  | -1.81290700 | -3.59811300 |
| H | 7.90801500  | 3.75121600  | -0.42475600 |
| H | 7.91458500  | 0.62324200  | -3.86649000 |
| H | 7.91214500  | 2.74880900  | -2.65130500 |
| H | -7.90009900 | 3.47062800  | -1.64909900 |
| H | -7.91030900 | 0.26903100  | 3.97254400  |
| H | -7.90163700 | 3.73951600  | 0.80256600  |
| H | -7.90647100 | 2.52172000  | 2.95016500  |
| H | -7.91122200 | -2.15288800 | 3.46651200  |
| H | -7.90157800 | 1.81220700  | -3.48128800 |
| H | -7.90939000 | -3.81120200 | 1.63469400  |
| H | -7.90335600 | -0.60958100 | -3.98786600 |
| H | -7.90497900 | -2.86212500 | -2.96557300 |
| H | -7.90680100 | -4.07987500 | -0.81783300 |
| C | 2.51427300  | 3.28417100  | 1.97964200  |
| C | -0.35908200 | 3.28210300  | 1.97621800  |
| C | 0.05540100  | 6.89484900  | -0.00825000 |
| O | 1.01667400  | 6.83298000  | -0.67588000 |
| O | -0.90600300 | 6.96983200  | 0.65846900  |

**Table S22.** B971/6-31G(d)-DCP optimized coordinates (Å) for CO<sub>2</sub> bound to the interior wall of [10,0]-SWNT.

|   |            |             |            |
|---|------------|-------------|------------|
| C | 6.12873100 | -2.37156600 | 3.19692200 |
| C | 6.81086800 | -3.26707700 | 2.32239100 |
| C | 4.67179100 | -2.36431800 | 3.18696000 |
| C | 3.95306300 | -3.23416200 | 2.29950800 |
| C | 1.79405800 | -2.37097300 | 3.19774900 |
| C | 2.51208700 | -3.23812900 | 2.30342400 |
| C | 0.35656900 | -2.37034800 | 3.19753200 |

|   |             |             |             |
|---|-------------|-------------|-------------|
| C | -0.36140000 | -3.24346900 | 2.30770200  |
| C | -2.51629000 | -2.37420200 | 3.20003500  |
| C | -1.79855900 | -3.24190700 | 2.30524700  |
| C | -3.95767800 | -2.37136000 | 3.19408500  |
| C | -4.66983400 | -3.25181500 | 2.30983700  |
| C | -6.81974700 | -2.37313600 | 3.19497700  |
| C | -6.12572100 | -3.24065300 | 2.30195800  |
| C | 6.12978300  | -0.04033700 | 3.98623400  |
| C | 6.81171200  | -1.27928300 | 3.80705200  |
| C | 4.67276900  | -0.04005800 | 3.97422700  |
| C | 3.95391600  | -1.26545400 | 3.76786200  |
| C | 1.79437000  | -0.03966800 | 3.98767400  |
| C | 2.51295400  | -1.26619300 | 3.77179200  |
| C | 0.35665700  | -0.03946900 | 3.98752800  |
| C | -0.36193400 | -1.26853500 | 3.77983300  |
| C | -2.51746700 | -0.04029700 | 3.99083200  |
| C | -1.79968700 | -1.26806000 | 3.77575100  |
| C | -3.95875300 | -0.04092800 | 3.98305700  |
| C | -4.67125500 | -1.27256900 | 3.78347400  |
| C | -6.82135700 | -0.04177200 | 3.98369100  |
| C | -6.12757000 | -1.26858300 | 3.77099500  |
| C | 6.12991900  | 2.30956200  | 3.25480400  |
| C | 6.81244800  | 1.20226200  | 3.83793400  |
| C | 4.67295400  | 2.30284900  | 3.24480600  |
| C | 3.95439700  | 1.19036700  | 3.79876500  |
| C | 1.79437400  | 2.30995200  | 3.25543300  |
| C | 2.51338600  | 1.19159500  | 3.80265800  |
| C | 0.35665200  | 2.30968800  | 3.25465600  |
| C | -0.36224400 | 1.19409200  | 3.81044100  |
| C | -2.51767500 | 2.31197800  | 3.25767100  |
| C | -1.80016600 | 1.19265200  | 3.80657600  |
| C | -3.95900200 | 2.30808900  | 3.25145300  |
| C | -4.67225200 | 1.19452700  | 3.81323500  |
| C | -6.82169800 | 2.30849000  | 3.25174700  |
| C | -6.12867800 | 1.19013100  | 3.79982400  |
| C | 6.12955800  | 3.78120900  | 1.28195900  |
| C | 6.81226200  | 3.22784500  | 2.40425700  |
| C | 4.67257900  | 3.77031400  | 1.27788200  |
| C | 3.95434500  | 3.19491600  | 2.37944100  |
| C | 1.79439200  | 3.77951800  | 1.28090100  |
| C | 0.35630300  | 3.78017200  | 1.28053200  |
| C | -2.51749600 | 3.78416500  | 1.28132400  |
| C | -1.80012300 | 3.19974900  | 2.38253700  |
| C | -3.95885700 | 3.77894500  | 1.27907300  |
| C | -4.67190500 | 3.20905000  | 2.38842600  |
| C | -6.82088900 | 3.77990800  | 1.27903600  |
| C | -6.12817700 | 3.19792400  | 2.38020500  |
| C | 6.12950500  | 3.80937800  | -1.17947900 |
| C | 6.81221900  | 4.02137900  | 0.05377800  |
| C | 4.67268000  | 3.79930300  | -1.17622700 |
| C | 3.95450900  | 3.98211800  | 0.05307000  |
| C | 1.79466800  | 3.81144500  | -1.18012400 |
| C | 2.51361200  | 3.98500700  | 0.05297500  |
| C | 0.35681700  | 3.81220900  | -1.18037500 |
| C | -0.36222100 | 3.99422900  | 0.05237500  |
| C | -2.51700600 | 3.81609100  | -1.18305100 |
| C | -1.79997500 | 3.98945200  | 0.05168700  |



|   |             |             |             |
|---|-------------|-------------|-------------|
| C | -3.95844400 | 3.81019800  | -1.18118100 |
| C | -4.67135000 | 4.00191000  | 0.05138200  |
| C | -6.82054400 | 3.80937200  | -1.18132100 |
| C | -6.12731600 | 3.98757400  | 0.05121500  |
| C | 6.12935200  | 2.38759700  | -3.18897600 |
| C | 6.81220200  | 3.28295200  | -2.31471500 |
| C | 4.67240700  | 2.38104100  | -3.17911700 |
| C | 3.95441000  | 3.25140300  | -2.29163600 |
| C | 1.79462500  | 2.38964600  | -3.18945600 |
| C | 2.51354800  | 3.25485500  | -2.29398900 |
| C | 0.35712000  | 2.39045400  | -3.18928400 |
| C | -0.36144000 | 3.26361900  | -2.29982400 |
| C | -2.51645400 | 2.39296000  | -3.19467300 |
| C | -1.79914300 | 3.26026200  | -2.29876000 |
| C | -3.95783900 | 2.38875900  | -3.18924000 |
| C | -4.67103000 | 3.26854700  | -2.30498600 |
| C | -6.82006100 | 2.38851900  | -3.19030700 |
| C | -6.12694700 | 3.25636000  | -2.29693800 |
| C | 6.12864600  | 0.05626500  | -3.97769400 |
| C | 6.81150600  | 1.29475300  | -3.79889800 |
| C | 4.67168900  | 0.05649500  | -3.96500600 |
| C | 3.95367400  | 1.28234500  | -3.75933800 |
| C | 1.79371000  | 0.05839600  | -3.97856300 |
| C | 2.51261500  | 1.28489000  | -3.76472000 |
| C | 0.35670500  | 0.05914300  | -3.97762100 |
| C | -0.36140300 | 1.28861400  | -3.77165900 |
| C | -2.51559600 | 0.05838200  | -3.98541000 |
| C | -1.79900700 | 1.28685700  | -3.76939400 |
| C | -3.95693100 | 0.05766800  | -3.97623500 |
| C | -4.67045700 | 1.28909200  | -3.77823700 |
| C | -6.81968000 | 0.05692200  | -3.97786900 |
| C | -6.12677700 | 1.28423700  | -3.76574800 |
| C | 6.12736700  | -2.29325500 | -3.24632400 |
| C | 6.81068900  | -1.18655200 | -3.82949300 |
| C | 4.67044400  | -2.28574300 | -3.23579600 |
| C | 3.95202800  | -1.17353600 | -3.79077300 |
| C | 1.79317900  | -2.29166600 | -3.24574700 |
| C | 2.51127900  | -1.17364400 | -3.79425800 |
| C | 0.35652100  | -2.29064400 | -3.24468700 |
| C | -0.36127100 | -1.17468200 | -3.80037400 |
| C | -2.51476900 | -2.29522200 | -3.25116200 |
| C | -1.79852200 | -1.17418300 | -3.79777100 |
| C | -3.95615800 | -2.29117100 | -3.24338600 |
| C | -4.66972500 | -1.17808300 | -3.80572400 |
| C | -6.81877600 | -2.29284500 | -3.24501300 |
| C | -6.12613900 | -1.17438000 | -3.79304800 |
| C | 6.12685100  | -3.76475900 | -1.27367600 |
| C | 6.80964800  | -3.21153200 | -2.39587700 |
| C | 4.66999700  | -3.75290700 | -1.26916200 |
| C | 3.95156000  | -3.17843900 | -2.37118500 |
| C | 1.79307200  | -3.76367500 | -1.27237900 |
| C | 2.51099000  | -3.18038700 | -2.37286700 |
| C | 0.35629900  | -3.76289800 | -1.27204300 |
| C | -0.36133900 | -3.18563300 | -2.37698700 |
| C | -2.51457500 | -3.76976600 | -1.27482900 |
| C | -1.79828100 | -3.18333700 | -2.37558100 |
| C | -3.95555500 | -3.76486000 | -1.27268700 |

|   |             |             |             |
|---|-------------|-------------|-------------|
| C | -4.66890300 | -3.19267600 | -2.38095500 |
| C | -6.81819100 | -3.76486200 | -1.27319700 |
| C | -6.12503200 | -3.18227400 | -2.37367200 |
| C | 6.12757300  | -3.79304600 | 1.18731700  |
| C | 6.81006600  | -4.00518900 | -0.04591900 |
| C | 4.67078400  | -3.78252300 | 1.18407300  |
| C | 3.95169900  | -3.96677700 | -0.04464500 |
| C | 1.79343100  | -3.79388800 | 1.18916500  |
| C | 2.51107800  | -3.96997500 | -0.04405300 |
| C | 0.35655200  | -3.79306500 | 1.18897100  |
| C | -0.36127400 | -3.97688600 | -0.04390300 |
| C | -2.51489700 | -3.80089500 | 1.19011300  |
| C | -1.79806200 | -3.97454000 | -0.04450900 |
| C | -3.95601300 | -3.79609300 | 1.18781000  |
| C | -4.66885200 | -3.98669400 | -0.04515900 |
| C | -6.81878400 | -3.79449200 | 1.18658500  |
| C | -6.12471500 | -3.97280600 | -0.04544400 |
| H | 7.90085100  | -3.25470800 | 2.31296200  |
| H | 7.90166600  | -1.27458300 | 3.79186200  |
| H | 7.90004400  | -3.99018300 | -0.04614800 |
| H | 7.90239600  | 1.19734700  | 3.82264300  |
| H | 7.89961700  | -3.19955600 | -2.38665500 |
| H | 7.90222100  | 3.21511900  | 2.39457700  |
| H | 7.90064400  | -1.18252700 | -3.81474700 |
| H | 7.90219200  | 4.00556000  | 0.05359400  |
| H | 7.90146100  | 1.28925100  | -3.78411300 |
| H | 7.90218100  | 3.26980300  | -2.30558000 |
| H | -7.91057800 | 3.78573400  | -1.17411400 |
| H | -7.91135500 | -0.04200100 | 3.95909800  |
| H | -7.91091300 | 3.75657100  | 1.27068900  |
| H | -7.91171000 | 2.29434600  | 3.23137700  |
| H | -7.90977100 | -2.35924700 | 3.17488700  |
| H | -7.91007700 | 2.37373300  | -3.17070900 |
| H | -7.90883000 | -3.77183900 | 1.17893000  |
| H | -7.90968700 | 0.05636500  | -3.95386500 |
| H | -7.90880900 | -2.27952200 | -3.22520900 |
| H | -7.90823300 | -3.74250200 | -1.26539200 |
| C | 2.51330600  | 3.19694800  | 2.38134500  |
| C | -0.36193600 | 3.20328600  | 2.38536300  |
| C | 0.06783900  | -0.31810000 | -0.14285800 |
| O | 1.24197500  | -0.32779400 | -0.21968900 |
| O | -1.10631400 | -0.33408200 | -0.07777700 |

**Table S23.** B971/6-31G(d)-DCP optimized coordinates (Å) for CO<sub>2</sub> bound to the exterior wall of [10,0]-N-SWNT.

|   |             |             |             |
|---|-------------|-------------|-------------|
| C | -6.13023000 | 0.03080100  | -3.86195400 |
| C | -6.82142600 | -1.20702800 | -3.77182900 |
| C | -4.66786400 | 0.01928300  | -3.89033400 |
| C | -3.95382100 | -1.22788500 | -3.79865200 |
| C | -1.79504100 | 0.00157600  | -3.92890800 |
| C | -2.51359000 | -1.23746500 | -3.82491700 |
| C | -0.35417900 | 0.00265300  | -3.93700500 |
| C | 0.36930700  | -1.23555600 | -3.82751600 |
| C | 2.51989700  | 0.02236200  | -3.91247800 |
| C | 1.80611300  | -1.22386900 | -3.81851500 |
| C | 3.96420300  | 0.03587700  | -3.89156400 |

|   |             |             |             |
|---|-------------|-------------|-------------|
| C | 4.69032500  | -1.19363700 | -3.77629100 |
| C | 6.81962000  | 0.06209000  | -3.93845300 |
| C | 6.14739700  | -1.18397100 | -3.78609400 |
| C | -6.10272800 | 2.33915400  | -2.99623800 |
| C | -6.80831900 | 1.26021800  | -3.60466700 |
| C | -4.64310700 | 2.32652700  | -3.00306500 |
| C | -3.94580000 | 1.22369800  | -3.62612800 |
| C | -1.78641700 | 2.27575400  | -3.00310100 |
| C | -2.51106900 | 1.21536700  | -3.65167300 |
| C | -0.35978600 | 2.27864500  | -3.00747400 |
| C | 0.36377500  | 1.21440900  | -3.65545500 |
| C | 2.49941500  | 2.31631600  | -3.01241200 |
| C | 1.79476100  | 1.22723200  | -3.65050100 |
| C | 3.94233400  | 2.33788800  | -3.01030500 |
| C | 4.67306000  | 1.25592900  | -3.61881400 |
| C | 6.79492200  | 2.39271300  | -3.05226400 |
| C | 6.12895800  | 1.27150300  | -3.63542700 |
| C | -6.06579100 | 3.79382900  | -1.00143400 |
| C | -6.76954000 | 3.23140400  | -2.11170600 |
| C | -4.61124600 | 3.79794400  | -1.00693000 |
| C | -3.92479700 | 3.15947600  | -2.10399400 |
| C | -1.77065400 | 3.67885300  | -0.98041000 |
| C | -2.48758700 | 3.11572600  | -2.08287200 |
| C | -0.36840000 | 3.67757600  | -0.98152500 |
| C | 0.34649100  | 3.10877600  | -2.08279000 |
| C | 2.48149000  | 3.74361400  | -0.99709700 |
| C | 1.77951600  | 3.14765800  | -2.11000200 |
| C | 3.92212100  | 3.75289100  | -0.99167800 |
| C | 4.64330300  | 3.20430100  | -2.11487700 |
| C | 6.78238200  | 3.78704800  | -1.00343800 |
| C | 6.10270200  | 3.21873100  | -2.12481600 |
| C | -6.06815600 | 3.65885000  | 1.43189000  |
| C | -6.76784700 | 3.95095400  | 0.22699400  |
| C | -4.61356200 | 3.66185400  | 1.44049700  |
| C | -3.89877800 | 3.92015900  | 0.22808600  |
| C | -1.77293100 | 3.54595200  | 1.40629600  |
| C | -0.37092600 | 3.54521800  | 1.41017500  |
| C | 2.47926400  | 3.60934300  | 1.43798000  |
| C | 1.76059100  | 3.89181200  | 0.23145900  |
| C | 3.92033400  | 3.61831500  | 1.43616100  |
| C | 4.63956000  | 3.91825000  | 0.23576100  |
| C | 6.78018400  | 3.65053500  | 1.45698900  |
| C | 6.09462500  | 3.91151000  | 0.23681100  |
| C | -6.10830900 | 1.99089000  | 3.25200500  |
| C | -6.77382100 | 2.97580000  | 2.47110300  |
| C | -4.64884900 | 1.97751100  | 3.26018900  |
| C | -3.92902300 | 2.90552300  | 2.46087200  |
| C | -1.79224200 | 1.92671000  | 3.26017100  |
| C | -2.49155700 | 2.86444100  | 2.43781400  |
| C | -0.36598600 | 1.92886400  | 3.26770100  |
| C | 0.34176800  | 2.85719700  | 2.44244000  |
| C | 2.49347000  | 1.96513700  | 3.28127800  |
| C | 1.77509800  | 2.89203500  | 2.47624100  |
| C | 3.93654000  | 1.98653700  | 3.28425000  |
| C | 4.63929900  | 2.94760200  | 2.49279700  |
| C | 6.78910700  | 2.03617100  | 3.33798000  |
| C | 6.09876400  | 2.96063600  | 2.50694700  |

|   |             |             |             |
|---|-------------|-------------|-------------|
| C | -6.13755600 | -0.39910300 | 3.85703000  |
| C | -6.81517000 | 0.85116200  | 3.73545500  |
| C | -4.67526500 | -0.41378300 | 3.88672300  |
| C | -3.95274800 | 0.81219200  | 3.75794500  |
| C | -1.80261200 | -0.43598000 | 3.92877400  |
| C | -2.51812400 | 0.80086700  | 3.78507700  |
| C | -0.36178000 | -0.43600300 | 3.93974400  |
| C | 0.35659900  | 0.79919900  | 3.79418800  |
| C | 2.51235800  | -0.41403100 | 3.92285300  |
| C | 1.78759500  | 0.81219700  | 3.79331700  |
| C | 3.95676900  | -0.39852000 | 3.90639100  |
| C | 4.66615300  | 0.84399700  | 3.77074200  |
| C | 6.81213900  | -0.37799400 | 3.96151100  |
| C | 6.12193800  | 0.85749200  | 3.79186600  |
| C | -6.13140200 | -2.71618200 | 3.03427600  |
| C | -6.82865500 | -1.61934400 | 3.62945700  |
| C | -4.67320100 | -2.73513400 | 3.05439200  |
| C | -3.96104300 | -1.64347900 | 3.65980400  |
| C | -1.79666100 | -2.74224200 | 3.07354100  |
| C | -2.52089600 | -1.65612400 | 3.68770200  |
| C | -0.35657400 | -2.74387800 | 3.08066600  |
| C | 0.36201700  | -1.65479700 | 3.69616600  |
| C | 2.52335400  | -2.71959800 | 3.07018000  |
| C | 1.79884000  | -1.64243900 | 3.69134300  |
| C | 3.96570700  | -2.70652100 | 3.06053200  |
| C | 4.68315300  | -1.60797300 | 3.65813300  |
| C | 6.82412200  | -2.71350000 | 3.09422400  |
| C | 6.14033700  | -1.59958500 | 3.67156900  |
| C | -6.11371000 | -4.10588500 | 1.00882200  |
| C | -6.81625200 | -3.57306500 | 2.13185500  |
| C | -4.66013300 | -4.12025200 | 1.01466100  |
| C | -3.95327600 | -3.58062000 | 2.14511100  |
| C | -1.78700500 | -4.09377500 | 1.01659700  |
| C | -2.51015700 | -3.58385800 | 2.15503000  |
| C | -0.34989200 | -4.09299500 | 1.01924300  |
| C | 0.36645100  | -3.57535000 | 2.15836700  |
| C | 2.52806000  | -4.07295100 | 1.01974100  |
| C | 1.80593800  | -3.56697100 | 2.15902200  |
| C | 3.96792100  | -4.06819800 | 1.01918600  |
| C | 4.68456900  | -3.54419600 | 2.15137800  |
| C | 6.82577800  | -4.08742000 | 1.03101800  |
| C | 6.14280500  | -3.54058200 | 2.15919100  |
| C | -6.11131900 | -3.97079800 | -1.44350300 |
| C | -6.80571900 | -4.23458800 | -0.22879600 |
| C | -4.65769500 | -3.98475400 | -1.44805400 |
| C | -3.94582600 | -4.23330200 | -0.22583500 |
| C | -1.78457900 | -3.95822100 | -1.44104700 |
| C | -2.50248700 | -4.22834400 | -0.22407500 |
| C | -0.34744200 | -3.95730800 | -1.44077500 |
| C | 0.37027700  | -4.21477300 | -0.22045000 |
| C | 2.53047000  | -3.93748800 | -1.43325800 |
| C | 1.80961700  | -4.20920100 | -0.21872100 |
| C | 3.97038100  | -3.93291300 | -1.42932400 |
| C | 4.68440300  | -4.19983000 | -0.21531800 |
| C | 6.82817700  | -3.95065700 | -1.43751800 |
| C | 6.14244200  | -4.19838800 | -0.21383300 |
| C | -6.12510800 | -2.36324200 | -3.30090900 |

|   |             |             |             |
|---|-------------|-------------|-------------|
| C | -6.81166200 | -3.31553000 | -2.50144500 |
| C | -4.66695000 | -2.38003600 | -3.32012600 |
| C | -3.94875200 | -3.32220600 | -2.50987600 |
| C | -1.79038200 | -2.38511500 | -3.33398900 |
| C | -2.50554600 | -3.32437500 | -2.51716800 |
| C | -0.35032200 | -2.38607500 | -3.33842700 |
| C | 0.37102700  | -3.31586600 | -2.51382400 |
| C | 2.52960600  | -2.36336400 | -3.31962300 |
| C | 1.81055500  | -3.30752500 | -2.51069500 |
| C | 3.97191000  | -2.35146300 | -3.30570100 |
| C | 4.68915600  | -3.28581100 | -2.49469100 |
| C | 6.83034200  | -2.35493000 | -3.33466900 |
| C | 6.14746000  | -3.28139000 | -2.49917500 |
| H | -7.91102700 | -1.20221900 | -3.73760000 |
| H | -7.89807200 | 1.26246300  | -3.57708400 |
| H | -7.90159700 | -3.29778300 | -2.47767700 |
| H | -7.85949000 | 3.23043900  | -2.08755300 |
| H | -7.89585100 | -4.20937600 | -0.22839400 |
| H | -7.85732700 | 3.93542200  | 0.22499200  |
| H | -7.90612400 | -3.55259500 | 2.10805300  |
| H | -7.86373600 | 2.97780000  | 2.44518100  |
| H | -7.91821700 | -1.61063400 | 3.59456000  |
| H | -7.90486200 | 0.85674000  | 3.70599700  |
| H | 7.87892700  | 2.03674700  | 3.31789100  |
| H | 7.88471900  | 2.39153800  | -3.03050200 |
| H | 7.87030800  | 3.63925600  | 1.45119700  |
| H | 7.87248700  | 3.77463300  | -0.99704700 |
| H | 7.90915600  | 0.06865100  | -3.91144600 |
| H | 7.90172000  | -0.36850700 | 3.93732900  |
| H | 7.92004400  | -2.34122300 | -3.31163300 |
| H | 7.91388600  | -2.69778400 | 3.07516100  |
| H | 7.91580200  | -4.06763000 | 1.02519100  |
| H | 7.91820300  | -3.93238400 | -1.42748400 |
| N | -2.49276000 | 3.95361600  | 0.23150800  |
| N | 0.35638500  | 3.94567200  | 0.23397900  |
| C | -0.07812200 | 6.90639200  | -0.14841900 |
| O | 0.74045000  | 6.91070100  | -0.98778600 |
| O | -0.89852700 | 6.91331000  | 0.68894600  |

**Table S24.** B971/6-31G(d)-DCP optimized coordinates (Å) for CO<sub>2</sub> bound to the interior wall of [10,0]-N-SWNT.

|   |             |            |             |
|---|-------------|------------|-------------|
| C | -6.15117500 | 3.85177400 | -0.16765800 |
| C | -6.84511200 | 3.63457500 | -1.38804100 |
| C | -4.68880200 | 3.87684900 | -0.18533000 |
| C | -3.97771600 | 3.65688300 | -1.41792300 |
| C | -1.81682000 | 3.90926800 | -0.21338200 |
| C | -2.53777000 | 3.68045500 | -1.43337300 |
| C | -0.37622300 | 3.91664900 | -0.21593400 |
| C | 0.34483300  | 3.68247400 | -1.43725500 |
| C | 2.49722800  | 3.89879000 | -0.19991000 |
| C | 1.78122600  | 3.67639000 | -1.42772800 |
| C | 3.94135000  | 3.88294400 | -0.18726100 |
| C | 4.66496200  | 3.64345100 | -1.39994900 |
| C | 6.79643900  | 3.93778800 | -0.17226200 |
| C | 6.12207200  | 3.65629400 | -1.39446300 |
| C | -6.11868400 | 3.23829400 | 2.22065700  |

|   |             |             |            |
|---|-------------|-------------|------------|
| C | -6.82639500 | 3.72664700  | 1.08360200 |
| C | -4.65911300 | 3.24207700  | 2.20410600 |
| C | -3.96433000 | 3.73994500  | 1.03827800 |
| C | -1.80290800 | 3.23387000  | 2.14650000 |
| C | -2.52987500 | 3.76223500  | 1.02374000 |
| C | -0.37664500 | 3.23809900  | 2.14601200 |
| C | 0.34453000  | 3.76459500  | 1.01627500 |
| C | 2.48263400  | 3.25040700  | 2.17716800 |
| C | 1.77511800  | 3.76307800  | 1.02655200 |
| C | 3.92536300  | 3.25322300  | 2.19600200 |
| C | 4.65296400  | 3.74203500  | 1.05311000 |
| C | 6.77784800  | 3.30553100  | 2.24009800 |
| C | 6.10870800  | 3.76293100  | 1.06383600 |
| C | -6.07912500 | 1.41701600  | 3.88737900 |
| C | -6.78393100 | 2.45833000  | 3.20646800 |
| C | -4.62441000 | 1.42301600  | 3.88930800 |
| C | -3.93921900 | 2.44154700  | 3.13080400 |
| C | -1.78344000 | 1.38378600  | 3.76868400 |
| C | -2.50198700 | 2.41444000  | 3.08616400 |
| C | -0.38088500 | 1.38467600  | 3.76644000 |
| C | 0.33212800  | 2.41435600  | 3.07417900 |
| C | 2.46949400  | 1.40910800  | 3.82297800 |
| C | 1.76535400  | 2.44638900  | 3.10575000 |
| C | 3.91041800  | 1.40518500  | 3.82749700 |
| C | 4.62920400  | 2.46108900  | 3.15538700 |
| C | 6.77071600  | 1.42205600  | 3.85145800 |
| C | 6.08875900  | 2.47384900  | 3.16490900 |
| C | -6.08049400 | -1.01615500 | 4.01207200 |
| C | -6.78038400 | 0.21247700  | 4.17687100 |
| C | -4.62586400 | -1.02405200 | 4.01482200 |
| C | -3.91139100 | 0.20883700  | 4.14421100 |
| C | -1.78478500 | -1.00100300 | 3.89089800 |
| C | -0.38221500 | -1.00388600 | 3.88898900 |
| C | 2.46837400  | -1.02523700 | 3.94791300 |
| C | 1.74809600  | 0.20361600  | 4.10706100 |
| C | 3.90930500  | -1.02191300 | 3.95182000 |
| C | 4.62917500  | 0.20326900  | 4.12293600 |
| C | 6.76975400  | -1.03837900 | 3.97728100 |
| C | 6.08402700  | 0.20211300  | 4.11090600 |
| C | -6.12252800 | -2.99848100 | 2.54111900 |
| C | -6.78676300 | -2.12091500 | 3.44200700 |
| C | -4.66295500 | -3.00633900 | 2.52563800 |
| C | -3.94193600 | -2.11623000 | 3.36553000 |
| C | -1.80640500 | -3.00844200 | 2.46867800 |
| C | -2.50464100 | -2.09575900 | 3.31888200 |
| C | -0.38003700 | -3.01472600 | 2.46902200 |
| C | 0.32981400  | -2.10037900 | 3.30732400 |
| C | 2.47967700  | -3.02621300 | 2.50082400 |
| C | 1.76310700  | -2.13050600 | 3.34204300 |
| C | 3.92249600  | -3.02768200 | 2.51914400 |
| C | 4.62722500  | -2.14174100 | 3.39199700 |
| C | 6.77508900  | -3.07654600 | 2.56721700 |
| C | 6.08670800  | -2.15438400 | 3.40231700 |
| C | -6.15548200 | -3.84665000 | 0.22602100 |
| C | -6.83080800 | -3.59724300 | 1.45850900 |
| C | -4.69314600 | -3.87545400 | 0.21142700 |
| C | -3.96862500 | -3.62002700 | 1.41589600 |

|   |             |             |             |
|---|-------------|-------------|-------------|
| C | -1.82110300 | -3.91440600 | 0.18761800  |
| C | -2.53409200 | -3.64603400 | 1.40430000  |
| C | -0.38054800 | -3.92377000 | 0.18608600  |
| C | 0.34058700  | -3.65292000 | 1.39762100  |
| C | 2.49329800  | -3.90748200 | 0.19998700  |
| C | 1.77143000  | -3.65178100 | 1.40755300  |
| C | 3.93748000  | -3.89142600 | 0.21044800  |
| C | 4.64952000  | -3.62908500 | 1.43068900  |
| C | 6.79246800  | -3.94677400 | 0.23009000  |
| C | 6.10535700  | -3.64948500 | 1.44290300  |
| C | -6.15449000 | -3.27710100 | -2.16646300 |
| C | -6.84892700 | -3.75030800 | -1.01003100 |
| C | -4.69635700 | -3.29715400 | -2.18615900 |
| C | -3.98162700 | -3.77831300 | -1.03657600 |
| C | -1.82060000 | -3.31232800 | -2.19641100 |
| C | -2.54175600 | -3.80465600 | -1.04900900 |
| C | -0.38072600 | -3.31828600 | -2.19963900 |
| C | 0.34070800  | -3.81000200 | -1.05214400 |
| C | 2.49905900  | -3.30681100 | -2.18344600 |
| C | 1.77719600  | -3.80505400 | -1.04360200 |
| C | 3.94124600  | -3.29760000 | -2.17502200 |
| C | 4.66095000  | -3.77318400 | -1.02017900 |
| C | 6.79931100  | -3.33435000 | -2.18515800 |
| C | 6.11793400  | -3.78722300 | -1.01385700 |
| C | -6.14167800 | -1.41830300 | -3.77215900 |
| C | -6.84207600 | -2.47592900 | -3.11636900 |
| C | -4.68815700 | -1.42472300 | -3.78973500 |
| C | -3.97915200 | -2.48735000 | -3.12920200 |
| C | -1.81528800 | -1.42180900 | -3.77075700 |
| C | -2.53620300 | -2.49598200 | -3.13463700 |
| C | -0.37809300 | -1.42363600 | -3.77251400 |
| C | 0.34040900  | -2.49629200 | -3.13088100 |
| C | 2.50046400  | -1.42114800 | -3.75654500 |
| C | 1.77977500  | -2.49625000 | -3.12524800 |
| C | 3.94025100  | -1.42046400 | -3.75467000 |
| C | 4.65819400  | -2.48794600 | -3.11028600 |
| C | 6.79803500  | -1.43425400 | -3.77745900 |
| C | 6.11643700  | -2.49573800 | -3.10883000 |
| C | -6.14056600 | 1.03381700  | -3.89790400 |
| C | -6.83503600 | -0.20195200 | -4.03053700 |
| C | -4.68715000 | 1.03737400  | -3.91642100 |
| C | -3.97492200 | -0.20338100 | -4.03742900 |
| C | -1.81401200 | 1.03454300  | -3.89851800 |
| C | -2.53170600 | -0.20384000 | -4.03722200 |
| C | -0.37673900 | 1.03507500  | -3.90105400 |
| C | 0.34185500  | -0.20480100 | -4.02930700 |
| C | 2.50203200  | 1.03008900  | -3.88338100 |
| C | 1.78118800  | -0.20560600 | -4.02503800 |
| C | 3.94175900  | 1.02725700  | -3.88059300 |
| C | 4.65612500  | -0.20746200 | -4.01965800 |
| C | 6.79972300  | 1.03461400  | -3.90384900 |
| C | 6.11412800  | -0.20851200 | -4.02016100 |
| C | -6.15146600 | 3.04722000  | -2.49147500 |
| C | -6.84002800 | 2.15374200  | -3.35448700 |
| C | -4.69332200 | 3.06407000  | -2.51366200 |
| C | -3.97698200 | 2.16175700  | -3.36940500 |
| C | -1.81723300 | 3.07630100  | -2.52685300 |

|   |             |             |             |
|---|-------------|-------------|-------------|
| C | -2.53400900 | 2.16898700  | -3.37658500 |
| C | -0.37718100 | 3.08069300  | -2.53107900 |
| C | 0.34318200  | 2.16754500  | -3.37415200 |
| C | 2.50266500  | 3.06640200  | -2.51221400 |
| C | 1.78251800  | 2.16563900  | -3.36735400 |
| C | 3.94483900  | 3.05592800  | -2.50193900 |
| C | 4.66111300  | 2.15406300  | -3.34921300 |
| C | 6.80317300  | 3.08729100  | -2.51428900 |
| C | 6.11930100  | 2.15987100  | -3.34784700 |
| H | -7.93474800 | 3.60238600  | -1.37757500 |
| H | -7.91615100 | 3.70014900  | 1.09133800  |
| H | -7.92990000 | 2.13168700  | -3.33171900 |
| H | -7.87389700 | 2.43443000  | 3.21023500  |
| H | -7.92510600 | -0.19996700 | -4.00255500 |
| H | -7.86989200 | 0.21225900  | 4.16244800  |
| H | -7.93195000 | -2.45090200 | -3.09644000 |
| H | -7.87668400 | -2.09519600 | 3.44291500  |
| H | -7.93850500 | -3.71554300 | -1.00309600 |
| H | -7.92053500 | -3.56885800 | 1.46326400  |
| H | 7.86492100  | -3.05671000 | 2.56344800  |
| H | 7.86766000  | 3.28459300  | 2.23843300  |
| H | 7.85982700  | -1.03336000 | 3.96127000  |
| H | 7.86080100  | 1.41469500  | 3.83688800  |
| H | 7.88603500  | 3.91321500  | -0.16514100 |
| H | 7.88208200  | -3.92254300 | 0.23435600  |
| H | 7.89294500  | 3.06684000  | -2.50066100 |
| H | 7.88909100  | -3.31380900 | -2.17370700 |
| H | 7.88810300  | -1.42622400 | -3.76077500 |
| H | 7.88976100  | 1.02684600  | -3.88547500 |
| N | -2.50427200 | 0.20987700  | 4.18170600  |
| N | 0.34515600  | 0.20718800  | 4.16202600  |
| C | -0.23601300 | 0.05976300  | -0.58371600 |
| O | 0.93346000  | 0.12649300  | -0.53246800 |
| O | -1.40552000 | -0.00720400 | -0.62389800 |

**Table S25.** B971/6-31G(d)-DCP optimized coordinates (Å) for CO<sub>2</sub> bound to the exterior wall of [8,4]-SWNT.

|   |             |             |             |
|---|-------------|-------------|-------------|
| C | -3.78066100 | -3.89053600 | -2.03821600 |
| C | -5.14878400 | -4.13527400 | -1.62927000 |
| C | 3.83503800  | -3.83863200 | -2.05630400 |
| C | 1.11557100  | -4.22170700 | -1.17605000 |
| C | -0.24537100 | -4.33316800 | -0.71298500 |
| C | -1.33057100 | -4.08568800 | -1.62068500 |
| C | -2.95232700 | -4.38905300 | 0.23051900  |
| C | -2.68409800 | -4.24607100 | -1.17120300 |
| C | -4.32037100 | -4.34761200 | 0.69733000  |
| C | -5.40625500 | -4.47983900 | -0.22163500 |
| C | -6.99635700 | -4.18534700 | 1.63248600  |
| C | -6.73674000 | -4.56265300 | 0.32895000  |
| C | 5.98989800  | -4.36347200 | -0.26394100 |
| C | 6.24251300  | -4.06659000 | -1.62919500 |
| C | 4.63595400  | -4.35304000 | 0.22089900  |
| C | 3.55730600  | -4.29122700 | -0.72346600 |
| C | 1.92614200  | -4.21123000 | 1.15799100  |
| C | 2.19517400  | -4.36277500 | -0.25269700 |
| C | 0.56837200  | -4.06528900 | 1.60706300  |



|   |             |             |            |
|---|-------------|-------------|------------|
| C | -0.51673000 | -4.33092400 | 0.69768800 |
| C | -2.14551600 | -3.61434400 | 2.43747300 |
| C | -1.87427300 | -4.22914700 | 1.15926800 |
| C | -3.50944800 | -3.31639000 | 2.80227500 |
| C | -4.58512900 | -3.87771700 | 2.03599200 |
| C | -6.19872100 | -2.67043000 | 3.45881700 |
| C | -5.94012700 | -3.64186800 | 2.45610400 |
| C | 6.78898300  | -4.01465700 | 2.02682700 |
| C | 7.04854300  | -4.38102100 | 0.72008300 |
| C | 5.45681200  | -3.66310500 | 2.45328100 |
| C | 4.37209300  | -4.04582400 | 1.60608700 |
| C | 2.73058300  | -2.98654800 | 3.14293300 |
| C | 3.00334900  | -3.84648800 | 2.02792300 |
| C | 1.37452800  | -2.62476700 | 3.44321000 |
| C | 0.29368400  | -3.32382700 | 2.80609400 |
| C | -1.34722900 | -1.80230100 | 3.90571400 |
| C | -1.06942700 | -2.99657400 | 3.14368900 |
| C | -2.70363400 | -1.35865500 | 4.05825300 |
| C | -3.79443900 | -2.22966500 | 3.69471200 |
| C | -5.43128200 | -0.42021000 | 4.27484600 |
| C | -5.16577000 | -1.82658700 | 3.93121800 |
| C | -6.76457700 | 0.12494900  | 4.34887700 |
| C | 6.22629000  | -1.77985300 | 3.92972500 |
| C | 5.19305300  | -2.62825800 | 3.46639200 |
| C | 3.53603900  | -0.88529900 | 4.14072700 |
| C | 3.82180600  | -2.21639200 | 3.68790600 |
| C | 2.17155000  | -0.42016000 | 4.20531700 |
| C | 1.09641100  | -1.34774100 | 4.05691300 |
| C | -0.54444300 | 0.51908900  | 4.15847800 |
| C | -0.26719300 | -0.89046500 | 4.16101200 |
| C | -1.90337900 | 0.97505400  | 4.04820600 |
| C | -2.97863200 | 0.04186300  | 4.20068600 |
| C | -4.61554400 | 1.84035100  | 3.67710400 |
| C | -4.34829700 | 0.50314500  | 4.14988300 |
| C | -5.97059800 | 2.25458500  | 3.43172700 |
| C | -7.02705400 | 1.42714300  | 3.96900500 |
| C | 7.02098900  | 0.57249800  | 4.24917300 |
| C | 5.96643600  | -0.41587900 | 4.22617200 |
| C | 4.34276300  | 1.44745200  | 3.90000200 |
| C | 4.61061100  | 0.06338200  | 4.20887200 |
| C | 2.97342800  | 1.86358700  | 3.69352200 |
| C | 1.89761800  | 0.98952800  | 4.05300300 |
| C | 0.26337600  | 2.62934100  | 3.15423700 |
| C | 0.53870400  | 1.43292900  | 3.89942800 |
| C | -1.09908500 | 2.96035500  | 2.81762600 |
| C | -2.17622200 | 2.25140300  | 3.43018100 |
| C | -3.82068000 | 3.49973700  | 2.03159100 |
| C | -3.53933900 | 2.61028100  | 3.12190800 |
| C | -5.19033900 | 3.73100800  | 1.61992400 |
| C | -6.22679000 | 3.25530000  | 2.45756400 |
| C | 6.75803700  | 1.87796100  | 3.88070800 |
| C | 5.16363900  | 3.30930600  | 2.48406000 |
| C | 5.42599700  | 2.29870100  | 3.52179300 |
| C | 3.79376000  | 3.52384400  | 2.06406900 |
| C | 2.70099200  | 2.97601300  | 2.83004900 |
| C | 1.07321400  | 3.87410900  | 1.17799000 |
| C | -0.28809500 | 3.96788900  | 0.71261000 |

|   |             |             |             |
|---|-------------|-------------|-------------|
| C | -2.99358100 | 4.00602700  | -0.23571800 |
| C | -2.72632900 | 3.86532000  | 1.16638000  |
| C | -4.35989500 | 3.95101800  | -0.70522200 |
| C | -5.44861100 | 4.07280400  | 0.21187700  |
| C | -7.03246500 | 3.76255300  | -1.64493500 |
| C | -6.77880000 | 4.14278700  | -0.34107800 |
| C | 5.94616200  | 4.07061200  | 0.27506100  |
| C | 6.19940300  | 3.77624900  | 1.64076900  |
| C | 4.59328900  | 4.04603200  | -0.21224800 |
| C | 3.51375400  | 3.97276500  | 0.73027800  |
| C | 1.88748200  | 3.87308600  | -1.15392000 |
| C | 2.15223400  | 4.02735800  | 0.25653400  |
| C | 0.53266100  | 3.71277200  | -1.60572000 |
| C | -0.55707400 | 3.96441500  | -0.69865700 |
| C | -2.17527400 | 3.23982100  | -2.44275300 |
| C | -1.91298900 | 3.85438400  | -1.16263800 |
| C | -3.53558200 | 2.92846600  | -2.80970700 |
| C | -4.61772700 | 3.47872200  | -2.04453700 |
| C | -6.21700100 | 2.25527400  | -3.46984300 |
| C | -5.96965400 | 3.22929400  | -2.46675000 |
| C | 6.75322500  | 3.73002500  | -2.01412600 |
| C | 7.00648800  | 4.09893200  | -0.70684400 |
| C | 5.42556900  | 3.36503700  | -2.44311300 |
| C | 4.33531000  | 3.73630800  | -1.59792700 |
| C | 2.70795600  | 2.66122100  | -3.13933700 |
| C | 2.96965900  | 3.52277100  | -2.02265200 |
| C | 1.35656500  | 2.28611900  | -3.44328200 |
| C | 0.26740700  | 2.97343800  | -2.80751100 |
| C | -1.35639700 | 1.43617000  | -3.90997100 |
| C | -1.09187500 | 2.63300400  | -3.14748900 |
| C | -2.70800700 | 0.97878100  | -4.06413700 |
| C | -3.80817500 | 1.83892800  | -3.70263700 |
| C | -5.42556900 | 0.01294100  | -4.28509000 |
| C | -5.17491200 | 1.42193800  | -3.94096400 |
| C | -6.75310100 | -0.54558600 | -4.36204600 |
| C | 6.21709100  | 1.48957800  | -3.91789200 |
| C | 5.17444700  | 2.32765700  | -3.45699200 |
| C | 3.53642700  | 0.56800400  | -4.13471500 |
| C | 3.80796600  | 1.90209600  | -3.68184100 |
| C | 2.17679200  | 0.08910800  | -4.20165300 |
| C | 1.09219100  | 1.00606700  | -4.05672400 |
| C | -0.52966600 | -0.87721000 | -4.15800600 |
| C | -0.26662500 | 0.53502100  | -4.16245700 |
| C | -1.88412100 | -1.34669300 | -4.04978200 |
| C | -2.96851300 | -0.42454500 | -4.20563600 |
| C | -4.58830200 | -2.23923500 | -3.68535900 |
| C | -4.33357700 | -0.89944300 | -4.15769000 |
| C | -5.93971000 | -2.66715900 | -3.44308900 |
| C | -7.00323100 | -1.85040800 | -3.98283600 |
| C | 7.03599700  | -0.85464800 | -4.23584900 |
| C | 5.97151700  | 0.12300900  | -4.21481600 |
| C | 4.36597700  | -1.75640400 | -3.89090200 |
| C | 4.62052100  | -0.36989000 | -4.20005800 |
| C | 3.00045300  | -2.18601400 | -3.68587000 |
| C | 1.91663900  | -1.32301800 | -4.04772700 |
| C | 0.29744600  | -2.97907200 | -3.15095200 |
| C | 0.56203900  | -1.77983400 | -3.89572000 |

|   |             |             |             |
|---|-------------|-------------|-------------|
| C | -1.06227100 | -3.32415700 | -2.81741300 |
| C | -2.14516900 | -2.62553400 | -3.43187100 |
| C | -3.50561200 | -2.99813100 | -3.12752200 |
| C | -6.18810000 | -3.67020800 | -2.46932400 |
| C | 6.78546800  | -2.16270300 | -3.86794100 |
| C | 5.20333600  | -3.60993100 | -2.47393500 |
| C | 5.45711600  | -2.59668300 | -3.51116000 |
| C | 2.73764100  | -3.30112400 | -2.82295700 |
| C | 1.38485400  | -3.60863800 | -2.45525200 |
| H | -7.25429500 | 1.99198600  | -3.66734900 |
| H | -7.22600600 | -3.87233400 | -2.21201400 |
| H | -7.23889700 | -2.41762400 | 3.65487900  |
| H | -7.26607600 | 3.44729700  | 2.19812000  |
| H | 7.28091900  | -3.94657600 | -1.93185400 |
| H | 7.23847400  | 3.66681600  | 1.94519800  |
| H | 7.26654600  | -2.07819200 | 3.81507900  |
| H | 7.25408400  | 1.79829100  | -3.80107600 |
| H | -7.58901200 | 0.09546600  | -4.63713000 |
| H | -8.02610400 | -2.22542200 | -3.95671400 |
| H | -7.56768400 | -4.84088800 | -0.31716200 |
| H | -8.02159400 | -4.16379400 | 2.00128700  |
| H | -7.59458500 | -0.52449200 | 4.62209200  |
| H | -8.05358200 | 1.79185800  | 3.94058300  |
| H | -7.61347000 | 4.41344800  | 0.30341400  |
| H | -8.05679300 | 3.73106200  | -2.01555400 |
| H | 7.58761200  | 2.57483700  | 3.77403500  |
| H | 7.62175800  | -2.85127800 | -3.75981100 |
| H | 8.05925300  | -0.52174200 | -4.40819300 |
| H | 8.04722100  | 0.24989900  | 4.42341300  |
| H | 8.07437200  | -4.54970400 | 0.39326400  |
| H | 7.62084400  | -3.90415500 | 2.72036900  |
| H | 8.02988800  | 4.27812800  | -0.37802600 |
| H | 7.58744000  | 3.62794000  | -2.70613900 |
| C | 1.34576200  | 3.26921400  | 2.46007300  |
| C | -1.37297600 | 3.71516800  | 1.61831800  |
| C | -0.27231700 | 7.12616600  | -0.00349500 |
| O | 0.79202300  | 7.11341700  | -0.49466800 |
| O | -1.33658700 | 7.15020800  | 0.48743900  |

**Table S26.** B971/6-31G(d)-DCP optimized coordinates (Å) for CO<sub>2</sub> bound to the interior wall of [8,4]-SWNT.

|   |             |             |             |
|---|-------------|-------------|-------------|
| C | -4.21663700 | 0.01257700  | -3.80788800 |
| C | -4.22590900 | 0.48683600  | -5.17695500 |
| C | -4.21499300 | -0.01326000 | 3.80815700  |
| C | -4.11010000 | 0.93673200  | 1.08677800  |
| C | -3.97504000 | 1.39214700  | -0.27442500 |
| C | -4.19525800 | 0.47706100  | -1.35888700 |
| C | -3.55189500 | 2.23828900  | -2.98060500 |
| C | -4.11070800 | 0.94508800  | -2.71268600 |
| C | -3.28274700 | 2.62420100  | -4.34751800 |
| C | -3.84080500 | 1.88406600  | -5.43517500 |
| C | -2.67560700 | 3.36111800  | -7.02084000 |
| C | -3.63965800 | 2.40480000  | -6.76508000 |
| C | -3.81744800 | 1.81406000  | 5.96121900  |
| C | -4.21977200 | 0.47612100  | 6.21480600  |
| C | -3.56629700 | 2.22983500  | 4.60752900  |

|   |             |             |             |
|---|-------------|-------------|-------------|
| C | -3.96390300 | 1.37155400  | 3.52874000  |
| C | -2.97297300 | 2.97344800  | 1.89897300  |
| C | -3.79153800 | 1.81494500  | 2.16652300  |
| C | -2.61945400 | 3.29083700  | 0.54220400  |
| C | -3.28637100 | 2.62263900  | -0.54495300 |
| C | -1.80795600 | 3.79171400  | -2.16718800 |
| C | -2.96624700 | 2.97372800  | -1.90104200 |
| C | -1.36457400 | 3.96476200  | -3.52867400 |
| C | -2.22137700 | 3.56631300  | -4.60804400 |
| C | -0.46860200 | 4.22398600  | -6.21331700 |
| C | -1.80533500 | 3.81830400  | -5.96133300 |
| C | -2.40732500 | 3.65115700  | 6.76289500  |
| C | -3.36253700 | 2.68644200  | 7.01992800  |
| C | -1.88530400 | 3.84965000  | 5.43344800  |
| C | -2.62515600 | 3.29168300  | 4.34598900  |
| C | -0.94422900 | 4.11624500  | 2.71129800  |
| C | -2.23858400 | 3.56010100  | 2.97898600  |
| C | -0.47499600 | 4.19901700  | 1.35757100  |
| C | -1.38818800 | 3.97789800  | 0.27219200  |
| C | 0.48239300  | 4.20072500  | -1.35800600 |
| C | -0.93150800 | 4.11217500  | -1.08774200 |
| C | 0.95046500  | 4.11661800  | -2.71094400 |
| C | 0.01888100  | 4.21948300  | -3.80663000 |
| C | 1.89084300  | 3.85052100  | -5.43268700 |
| C | 0.49291200  | 4.23076500  | -5.17524300 |
| C | 2.41381500  | 3.65299800  | -6.76192500 |
| C | 0.47391200  | 4.22610100  | 6.21443100  |
| C | -0.48782100 | 4.23141500  | 5.17610200  |
| C | 1.37150300  | 3.96895700  | 3.52951500  |
| C | -0.01296300 | 4.22168000  | 3.80747000  |
| C | 1.81613400  | 3.79733700  | 2.16763300  |
| C | 0.93987100  | 4.11594400  | 1.08662200  |
| C | 2.62772800  | 3.29687400  | -0.54343300 |
| C | 1.39703000  | 3.98412400  | -0.27374500 |
| C | 2.97881200  | 2.97635600  | -1.89895400 |
| C | 2.24408800  | 3.56150500  | -2.97840800 |
| C | 3.57057300  | 2.23064100  | -4.60634200 |
| C | 2.62990300  | 3.29251400  | -4.34513000 |
| C | 3.82270900  | 1.81526100  | -5.95976100 |
| C | 3.36903400  | 2.68832500  | -7.01850300 |
| C | 2.68019600  | 3.36085300  | 7.02207500  |
| C | 1.81081700  | 3.81968700  | 5.96249600  |
| C | 3.28889700  | 2.62635700  | 4.34808000  |
| C | 2.22777700  | 3.56888300  | 4.60908900  |
| C | 3.55792800  | 2.24083600  | 2.98062500  |
| C | 2.97382300  | 2.97799800  | 1.90074400  |
| C | 3.97410900  | 1.39242800  | 0.27353800  |
| C | 3.29198000  | 2.62644200  | 0.54369400  |
| C | 4.10765900  | 0.93730200  | -1.08701500 |
| C | 3.79251400  | 1.81580700  | -2.16580200 |
| C | 4.21575000  | -0.01230300 | -3.80686800 |
| C | 3.96526100  | 1.37194400  | -3.52739300 |
| C | 4.22629600  | -0.48569300 | -5.17605000 |
| C | 4.22344100  | 0.47722300  | -6.21304100 |
| C | 3.64342300  | 2.40361200  | 6.76566300  |
| C | 4.22952400  | 0.48698400  | 5.17644100  |
| C | 3.84520300  | 1.88406300  | 5.43539600  |

|   |             |             |             |
|---|-------------|-------------|-------------|
| C | 4.21861600  | 0.01286600  | 3.80712100  |
| C | 4.11261500  | 0.94573700  | 2.71196900  |
| C | 4.10949400  | -0.93758800 | 1.08655600  |
| C | 3.97432800  | -1.39262000 | -0.27437500 |
| C | 3.55561300  | -2.23949500 | -2.98121900 |
| C | 4.10965700  | -0.94486900 | -2.71228700 |
| C | 3.28737400  | -2.62533900 | -4.34848500 |
| C | 3.84339900  | -1.88307300 | -5.43531300 |
| C | 2.68100000  | -3.36109800 | -7.02221200 |
| C | 3.64392300  | -2.40387300 | -6.76531100 |
| C | 3.82316400  | -1.81362500 | 5.96176800  |
| C | 4.22837700  | -0.47615500 | 6.21403600  |
| C | 3.57145700  | -2.23024200 | 4.60828200  |
| C | 3.96829400  | -1.37241400 | 3.52844700  |
| C | 2.98113800  | -2.97835800 | 1.89969200  |
| C | 3.79572200  | -1.81690400 | 2.16644800  |
| C | 2.62922500  | -3.29874200 | 0.54323800  |
| C | 3.29258200  | -2.62717900 | -0.54456000 |
| C | 1.81563100  | -3.79759100 | -2.16858400 |
| C | 2.97305700  | -2.97782500 | -1.90175800 |
| C | 1.37097800  | -3.96954100 | -3.53038800 |
| C | 2.22731400  | -3.56909000 | -4.60967400 |
| C | 0.47395500  | -4.22612400 | -6.21524700 |
| C | 1.81091100  | -3.82017700 | -5.96317000 |
| C | 2.41051500  | -3.64854500 | 6.76520100  |
| C | 3.36686900  | -2.68446800 | 7.02139800  |
| C | 1.89004500  | -3.84994000 | 5.43528600  |
| C | 2.63121000  | -3.29347800 | 4.34733400  |
| C | 0.95092400  | -4.11934500 | 2.71225200  |
| C | 2.24588600  | -3.56394200 | 2.98012500  |
| C | 0.48235500  | -4.20336000 | 1.35839800  |
| C | 1.39741900  | -3.98595000 | 0.27331800  |
| C | -0.47572500 | -4.20074600 | -1.35864100 |
| C | 0.93968000  | -4.11740600 | -1.08762700 |
| C | -0.94513200 | -4.11746800 | -2.71241600 |
| C | -0.01344400 | -4.22250000 | -3.80839900 |
| C | -1.88571600 | -3.84972600 | -5.43474100 |
| C | -0.48796100 | -4.23238000 | -5.17714800 |
| C | -2.40689000 | -3.64972300 | -6.76457900 |
| C | -0.46993400 | -4.22779400 | 6.21480000  |
| C | 0.49257000  | -4.23269100 | 5.17696800  |
| C | -1.36599900 | -3.96792400 | 3.52953200  |
| C | 0.01831400  | -4.22221100 | 3.80788000  |
| C | -1.80974500 | -3.79505800 | 2.16768400  |
| C | -0.93278400 | -4.11556900 | 1.08750300  |
| C | -2.62152400 | -3.29314100 | -0.54318000 |
| C | -1.38984300 | -3.98077100 | -0.27319800 |
| C | -2.97446000 | -2.97482200 | -1.89997400 |
| C | -2.23955800 | -3.56118300 | -2.97992300 |
| C | -3.56745700 | -2.23009100 | -4.60820500 |
| C | -2.62596700 | -3.29225100 | -4.34707000 |
| C | -3.81864900 | -1.81368100 | -5.96189800 |
| C | -3.36247700 | -2.68518100 | -7.02115700 |
| C | -2.67596500 | -3.36166000 | 7.02196800  |
| C | -1.80639200 | -3.82002000 | 5.96246200  |
| C | -3.28362800 | -2.62563400 | 4.34820800  |
| C | -2.22253800 | -3.56807200 | 4.60899000  |

|   |             |             |             |
|---|-------------|-------------|-------------|
| C | -3.55408600 | -2.24055300 | 2.98109500  |
| C | -2.96809100 | -2.97601500 | 1.90108200  |
| C | -3.97658600 | -1.39369300 | 0.27408000  |
| C | -3.28859100 | -2.62483300 | 0.54443200  |
| C | -4.11146700 | -0.93809400 | -1.08714100 |
| C | -3.79324300 | -1.81629700 | -2.16695000 |
| C | -3.96576200 | -1.37238400 | -3.52912100 |
| C | -4.22261700 | -0.47598300 | -6.21456100 |
| C | -3.63894800 | -2.40433300 | 6.76578700  |
| C | -4.22314500 | -0.48693000 | 5.17741500  |
| C | -3.83950800 | -1.88390500 | 5.43593500  |
| C | -4.11069600 | -0.94612100 | 2.71297000  |
| C | -4.19527500 | -0.47834000 | 1.35888800  |
| H | 0.15194400  | -4.27269400 | -7.25377000 |
| H | -4.26914400 | -0.15446400 | -7.25338300 |
| H | -0.14689500 | 4.27172800  | -7.25172500 |
| H | 4.27102400  | 0.15654100  | -7.25181400 |
| H | -4.26728800 | 0.15532500  | 7.25365800  |
| H | 4.27663400  | -0.15503500 | 7.25289400  |
| H | 0.15216500  | 4.27362600  | 7.25287100  |
| H | -0.14857400 | -4.27582900 | 7.25347400  |
| H | -1.97868500 | -4.20485100 | -7.59751500 |
| H | -3.67458000 | -2.48412500 | -8.04584300 |
| H | -4.19360500 | 1.97573300  | -7.59848100 |
| H | -2.47398700 | 3.67281000  | -8.04538500 |
| H | 1.98659200  | 4.20919000  | -7.59447300 |
| H | 3.68184400  | 2.48799100  | -8.04293400 |
| H | 4.19785700  | -1.97418400 | -7.59816800 |
| H | 2.47983700  | -3.67250400 | -8.04701100 |
| H | 4.19483000  | 1.97179500  | 7.59936700  |
| H | -4.19093100 | -1.97324200 | 7.59937800  |
| H | -2.47332500 | -3.67152500 | 8.04692300  |
| H | 2.47693300  | 3.66996900  | 8.04712600  |
| H | -3.67289200 | 2.48464600  | 8.04486600  |
| H | -1.97829400 | 4.20540600  | 7.59590000  |
| H | 3.67723700  | -2.48201600 | 8.04633200  |
| H | 1.98040800  | -4.20141100 | 7.59876200  |
| C | 4.19279200  | 0.47707700  | 1.35801100  |
| C | 4.19113100  | -0.47683600 | -1.35856800 |
| C | 0.47708400  | 0.00120700  | 0.01233000  |
| O | 0.47300300  | -0.69271000 | 0.95706000  |
| O | 0.47643000  | 0.69459800  | -0.93187700 |

**Table S27.** B971/6-31G(d)-DCP optimized coordinates (Å) for CO<sub>2</sub> bound to the exterior wall of [8,4]-N-SWNT.

|   |             |             |             |
|---|-------------|-------------|-------------|
| C | -4.25640200 | 0.00906700  | -3.81575600 |
| C | -4.27486200 | 0.48676100  | -5.18274200 |
| C | -4.22630500 | -0.01850700 | 3.81379400  |
| C | -4.12779100 | 0.92915400  | 1.08613100  |
| C | -4.00441700 | 1.38825600  | -0.27297000 |
| C | -4.22057500 | 0.46956500  | -1.35916200 |
| C | -3.60272900 | 2.23466200  | -2.98903800 |
| C | -4.14588100 | 0.94071600  | -2.71888700 |
| C | -3.34378600 | 2.62309300  | -4.35555100 |
| C | -3.90537900 | 1.87736600  | -5.44047600 |
| C | -2.74796300 | 3.35023500  | -7.03869100 |

|   |             |             |             |
|---|-------------|-------------|-------------|
| C | -3.71270300 | 2.40240000  | -6.77560100 |
| C | -3.80214500 | 1.79388400  | 5.97442400  |
| C | -4.22151100 | 0.47022800  | 6.22613400  |
| C | -3.55777100 | 2.21570400  | 4.61660500  |
| C | -3.96833500 | 1.36686500  | 3.53761400  |
| C | -2.98408900 | 2.95743600  | 1.90124500  |
| C | -3.79753300 | 1.81166900  | 2.17238400  |
| C | -2.64807700 | 3.28737400  | 0.53906600  |
| C | -3.32000300 | 2.62213300  | -0.54520700 |
| C | -1.85873000 | 3.78796900  | -2.18325900 |
| C | -3.00525100 | 2.97376700  | -1.90703900 |
| C | -1.41821800 | 3.95700300  | -3.54986000 |
| C | -2.27718400 | 3.55734400  | -4.62408200 |
| C | -0.52611000 | 4.18939900  | -6.24448000 |
| C | -1.85750100 | 3.79618100  | -5.98362700 |
| C | -2.36068900 | 3.60771900  | 6.77684100  |
| C | -3.32914900 | 2.66337500  | 7.03588400  |
| C | -1.84476400 | 3.80790200  | 5.43873600  |
| C | -2.60854100 | 3.26996600  | 4.35367100  |
| C | -0.94356600 | 4.08329100  | 2.71144300  |
| C | -2.23264900 | 3.54173400  | 2.98567400  |
| C | -0.49175600 | 4.18327600  | 1.34400000  |
| C | -1.42032500 | 3.97981100  | 0.26140600  |
| C | 0.43489000  | 4.19111500  | -1.38030500 |
| C | -0.97219200 | 4.11498500  | -1.10014400 |
| C | 0.90191400  | 4.09594500  | -2.74097000 |
| C | -0.03092700 | 4.19990800  | -3.83593500 |
| C | 1.83536400  | 3.81135600  | -5.45774000 |
| C | 0.44493600  | 4.19005500  | -5.20382800 |
| C | 2.36829300  | 3.60551200  | -6.79410800 |
| C | 0.52866700  | 4.16771200  | 6.20440500  |
| C | -0.45602300 | 4.17616600  | 5.17305700  |
| C | 1.38504800  | 3.93290500  | 3.50888800  |
| C | 0.00220100  | 4.18249300  | 3.80063200  |
| C | 1.80505500  | 3.75976300  | 2.13612100  |
| C | 0.90628900  | 4.09689100  | 1.05901200  |
| C | 2.57234500  | 3.26511200  | -0.57624900 |
| C | 1.35310900  | 3.97528700  | -0.29806600 |
| C | 2.91986600  | 2.94707500  | -1.92294500 |
| C | 2.19058100  | 3.54303600  | -3.01066500 |
| C | 3.54814600  | 2.22173200  | -4.61944500 |
| C | 2.58455000  | 3.27535800  | -4.37040600 |
| C | 3.81449700  | 1.79798700  | -5.97549400 |
| C | 3.34432500  | 2.66970500  | -7.04308500 |
| C | 2.77131900  | 3.35274100  | 6.98067300  |
| C | 1.85703300  | 3.77991500  | 5.93391800  |
| C | 3.35098200  | 2.62779200  | 4.29162800  |
| C | 2.26429400  | 3.54347900  | 4.56761600  |
| C | 3.58613700  | 2.23206900  | 2.92113500  |
| C | 2.92930000  | 2.94591400  | 1.85496500  |
| C | 3.93416100  | 1.37144400  | 0.23149100  |
| C | 3.23221600  | 2.58270400  | 0.49850300  |
| C | 4.05629600  | 0.92370700  | -1.10564900 |
| C | 3.72466900  | 1.79274300  | -2.18060900 |
| C | 4.26124300  | 0.00053200  | -3.80592500 |
| C | 3.94728000  | 1.37699600  | -3.54706700 |
| C | 4.27801000  | -0.48694200 | -5.16936500 |

|   |             |             |             |
|---|-------------|-------------|-------------|
| C | 4.26298100  | 0.48840000  | -6.21712200 |
| C | 3.75091600  | 2.42608300  | 6.70913200  |
| C | 4.31553200  | 0.52223700  | 5.10090600  |
| C | 3.94447000  | 1.90458700  | 5.36911100  |
| C | 4.29062900  | 0.03514100  | 3.73799100  |
| C | 4.14713700  | 0.96112400  | 2.64361100  |
| C | 4.06535500  | -0.88863900 | 1.03799100  |
| C | 3.93451400  | -1.33510700 | -0.29908200 |
| C | 3.57314200  | -2.20057400 | -2.98373600 |
| C | 4.12878500  | -0.92541000 | -2.70932700 |
| C | 3.32980900  | -2.59718000 | -4.35235000 |
| C | 3.91219800  | -1.87158700 | -5.43437100 |
| C | 2.73345700  | -3.32565900 | -7.03680000 |
| C | 3.71045200  | -2.39392400 | -6.77259100 |
| C | 3.86976900  | -1.76498200 | 5.91012500  |
| C | 4.31260300  | -0.45343200 | 6.14876700  |
| C | 3.59469400  | -2.18932900 | 4.55573500  |
| C | 3.98124700  | -1.34263900 | 3.48102600  |
| C | 2.94735900  | -2.91723000 | 1.86470300  |
| C | 3.74665600  | -1.75796600 | 2.11622700  |
| C | 2.59118800  | -3.23738100 | 0.52050400  |
| C | 3.23917400  | -2.55264000 | -0.55962200 |
| C | 1.80620600  | -3.73864100 | -2.18559400 |
| C | 2.92796400  | -2.91724800 | -1.91334700 |
| C | 1.37661700  | -3.91313300 | -3.55486300 |
| C | 2.24575800  | -3.51856200 | -4.62018600 |
| C | 0.50088200  | -4.15260400 | -6.24356700 |
| C | 1.82924700  | -3.75724600 | -5.98328700 |
| C | 2.43983900  | -3.58034000 | 6.74004500  |
| C | 3.41268900  | -2.63949600 | 6.98130300  |
| C | 1.89705500  | -3.78812900 | 5.40760800  |
| C | 2.63457900  | -3.24824000 | 4.31449000  |
| C | 0.94342100  | -4.07845300 | 2.69844500  |
| C | 2.23078000  | -3.51778100 | 2.95804600  |
| C | 0.46615100  | -4.17613500 | 1.34148400  |
| C | 1.37464500  | -3.95567100 | 0.25198400  |
| C | -0.48201600 | -4.17423900 | -1.37562300 |
| C | 0.91800400  | -4.07990600 | -1.10170100 |
| C | -0.94486400 | -4.07642300 | -2.73938400 |
| C | -0.00713600 | -4.17027600 | -3.83592500 |
| C | -1.86875800 | -3.80559800 | -5.45949500 |
| C | -0.47586900 | -4.16619200 | -5.20484800 |
| C | -2.39615400 | -3.60785000 | -6.79339200 |
| C | -0.45578200 | -4.17872200 | 6.21319800  |
| C | 0.50682900  | -4.17463900 | 5.16476000  |
| C | -1.37076100 | -3.95195100 | 3.52565000  |
| C | 0.02004000  | -4.18735900 | 3.80072200  |
| C | -1.82296600 | -3.78531800 | 2.16250800  |
| C | -0.94342600 | -4.10804400 | 1.07242700  |
| C | -2.63630100 | -3.28904700 | -0.55367900 |
| C | -1.40286200 | -3.97518700 | -0.28571300 |
| C | -2.98462900 | -2.96085100 | -1.91321800 |
| C | -2.23906400 | -3.54148300 | -3.00345100 |
| C | -3.58322900 | -2.22192600 | -4.62388700 |
| C | -2.62678300 | -3.27149000 | -4.36845400 |
| C | -3.84034500 | -1.80123700 | -5.97970400 |
| C | -3.37146500 | -2.66843200 | -7.04481200 |



|   |             |             |             |
|---|-------------|-------------|-------------|
| C | -2.67561400 | -3.35147300 | 7.02496200  |
| C | -1.79132000 | -3.79285400 | 5.96285300  |
| C | -3.29663800 | -2.62789000 | 4.34645300  |
| C | -2.22308100 | -3.55653000 | 4.60663700  |
| C | -3.56832600 | -2.24086600 | 2.98197200  |
| C | -2.97577600 | -2.97709200 | 1.89527100  |
| C | -3.99554000 | -1.39663300 | 0.26908600  |
| C | -3.30289100 | -2.62705900 | 0.53591600  |
| C | -4.13182700 | -0.93815700 | -1.08905900 |
| C | -3.80601500 | -1.81904600 | -2.17789200 |
| C | -3.98953100 | -1.37506500 | -3.54165900 |
| C | -4.26828800 | -0.47963500 | -6.22803300 |
| C | -3.64740200 | -2.40881300 | 6.76943500  |
| C | -4.23177000 | -0.49619000 | 5.18087100  |
| C | -3.85317600 | -1.88485500 | 5.43578000  |
| C | -4.11987000 | -0.94965500 | 2.71608000  |
| C | -4.20754500 | -0.47894800 | 1.35694000  |
| H | 0.18238700  | -4.19759100 | -7.28311300 |
| H | -4.32953900 | -0.15482100 | -7.26476400 |
| H | -0.20612800 | 4.23493800  | -7.28365300 |
| H | 4.32960800  | 0.15774600  | -7.25132700 |
| H | -4.27318800 | 0.14520000  | 7.26331900  |
| H | 4.38651400  | -0.12277300 | 7.18247500  |
| H | 0.21783100  | 4.21113300  | 7.24633500  |
| H | -0.12735400 | -4.22247600 | 7.24980100  |
| H | -1.96152200 | -4.15869700 | -7.62593500 |
| H | -3.69658200 | -2.47459200 | -8.06670500 |
| H | -4.28427400 | 1.98328300  | -7.60212000 |
| H | -2.55652200 | 3.66847100  | -8.06319100 |
| H | 1.94322800  | 4.16287300  | -7.62736600 |
| H | 3.67838300  | 2.48192500  | -8.06306200 |
| H | 4.29795100  | -1.99118100 | -7.59629400 |
| H | 2.54470700  | -3.64897200 | -8.06007900 |
| H | 4.34699500  | 2.02636800  | 7.52810500  |
| H | -4.21472300 | -1.99267700 | 7.60036600  |
| H | -2.47439400 | -3.66863200 | 8.04791700  |
| H | 2.58874200  | 3.67528600  | 8.00531700  |
| H | -3.64537000 | 2.46799100  | 8.06027200  |
| H | -1.92240900 | 4.16098000  | 7.60585800  |
| H | 3.75459300  | -2.45058000 | 7.99846300  |
| H | 2.02498200  | -4.14088200 | 7.57627500  |
| N | 4.23376100  | -0.46493700 | -1.38167600 |
| N | 4.25416300  | 0.50249800  | 1.31267000  |
| C | 7.26332300  | -0.28773400 | 1.06835500  |
| O | 7.30629100  | -0.62971200 | 2.18846500  |
| O | 7.22476200  | 0.05295700  | -0.05309700 |

**Table S28.** B971/6-31G(d)-DCP optimized coordinates (Å) for CO<sub>2</sub> bound to the interior wall of [8,4]-N-SWNT.

|   |             |             |             |
|---|-------------|-------------|-------------|
| C | -4.23955500 | 0.01306300  | -3.81494500 |
| C | -4.25116400 | 0.49077400  | -5.18193300 |
| C | -4.23955200 | -0.01362800 | 3.81513600  |
| C | -4.12732100 | 0.93326200  | 1.08766600  |
| C | -3.99677200 | 1.39131300  | -0.27113600 |
| C | -4.21144700 | 0.47358900  | -1.35824600 |
| C | -3.58149700 | 2.23597100  | -2.98564300 |

|   |             |            |             |
|---|-------------|------------|-------------|
| C | -4.13012400 | 0.94428100 | -2.71770200 |
| C | -3.31639300 | 2.62383400 | -4.35099600 |
| C | -3.87612400 | 1.88009300 | -5.43817700 |
| C | -2.70794300 | 3.34960500 | -7.03157100 |
| C | -3.67659600 | 2.40467200 | -6.77252400 |
| C | -3.81981800 | 1.79782000 | 5.97724900  |
| C | -4.24321100 | 0.47519000 | 6.22737400  |
| C | -3.56901700 | 2.21898700 | 4.62037600  |
| C | -3.97738400 | 1.37105200 | 3.53988700  |
| C | -2.98120700 | 2.95758200 | 1.90714000  |
| C | -3.79955300 | 1.81494600 | 2.17529700  |
| C | -2.63789400 | 3.28519200 | 0.54613400  |
| C | -3.30677400 | 2.62207000 | -0.54090300 |
| C | -1.83588500 | 3.78286400 | -2.17266500 |
| C | -2.98538900 | 2.97240400 | -1.90124800 |
| C | -1.39025000 | 3.95146300 | -3.53741300 |
| C | -2.24604000 | 3.55487000 | -4.61506900 |
| C | -0.48715500 | 4.18292800 | -6.22827800 |
| C | -1.82051200 | 3.79296700 | -5.97288000 |
| C | -2.37661100 | 3.60780500 | 6.78517400  |
| C | -3.34884000 | 2.66633200 | 7.04045200  |
| C | -1.85460200 | 3.80623700 | 5.44917200  |
| C | -2.61564700 | 3.27037200 | 4.36113800  |
| C | -0.94121700 | 4.07716200 | 2.72550500  |
| C | -2.23317300 | 3.54026900 | 2.99464500  |
| C | -0.48351300 | 4.17472500 | 1.35981700  |
| C | -1.40730400 | 3.97343000 | 0.27313400  |
| C | 0.45425100  | 4.18115700 | -1.36044000 |
| C | -0.95338800 | 4.10781300 | -1.08620400 |
| C | 0.92597900  | 4.08445500 | -2.71893900 |
| C | -0.00165400 | 4.19119700 | -3.81771500 |
| C | 1.87000600  | 3.79952400 | -5.43191200 |
| C | 0.47952900  | 4.18117500 | -5.18361700 |
| C | 2.40835000  | 3.59368500 | -6.76619600 |
| C | 0.51722600  | 4.15829400 | 6.22424400  |
| C | -0.46354400 | 4.16958700 | 5.18917800  |
| C | 1.38312600  | 3.92006300 | 3.53230500  |
| C | 0.00008700  | 4.17414500 | 3.81858700  |
| C | 1.80764200  | 3.74556900 | 2.16136300  |
| C | 0.91498500  | 4.08469900 | 1.08020700  |
| C | 2.58481700  | 3.25023400 | -0.54818600 |
| C | 1.36720700  | 3.96387100 | -0.27501900 |
| C | 2.93658400  | 2.93119000 | -1.89303200 |
| C | 2.21372500  | 3.52866300 | -2.98349400 |
| C | 3.57521300  | 2.20583800 | -4.58725900 |
| C | 2.61299900  | 3.26129800 | -4.34167000 |
| C | 3.84651200  | 1.78231800 | -5.94250600 |
| C | 3.38319900  | 2.65581000 | -7.01165600 |
| C | 2.75492700  | 3.33728400 | 7.00906900  |
| C | 1.84546700  | 3.76625300 | 5.95894700  |
| C | 3.34309500  | 2.61040400 | 4.32227200  |
| C | 2.25738400  | 3.52840200 | 4.59426100  |
| C | 3.58258200  | 2.21440600 | 2.95275200  |
| C | 2.93008500  | 2.92808400 | 1.88466200  |
| C | 3.93628000  | 1.35183700 | 0.26525400  |
| C | 3.23669600  | 2.56508200 | 0.52904200  |
| C | 4.06417800  | 0.90574600 | -1.07210700 |

|   |             |             |             |
|---|-------------|-------------|-------------|
| C | 3.73867100  | 1.77521300  | -2.14788700 |
| C | 4.28041000  | -0.01680000 | -3.77188900 |
| C | 3.96754200  | 1.36003700  | -3.51363900 |
| C | 4.30076900  | -0.50398500 | -5.13541400 |
| C | 4.29231800  | 0.47174200  | -6.18297300 |
| C | 3.73372300  | 2.40858400  | 6.74119700  |
| C | 4.30082200  | 0.50345900  | 5.13557500  |
| C | 3.93183400  | 1.88677300  | 5.40213200  |
| C | 4.28044200  | 0.01627800  | 3.77205500  |
| C | 4.14249400  | 0.94218200  | 2.67637700  |
| C | 4.06406500  | -0.90623900 | 1.07226300  |
| C | 3.93618000  | -1.35230500 | -0.26511600 |
| C | 3.58253100  | -2.21493500 | -2.95258900 |
| C | 4.14245200  | -0.94270300 | -2.67621300 |
| C | 3.34303500  | -2.61093300 | -4.32210500 |
| C | 3.93176200  | -1.88729500 | -5.40196900 |
| C | 2.75485700  | -3.33781400 | -7.00890200 |
| C | 3.73364400  | -2.40910400 | -6.74103400 |
| C | 3.84652600  | -1.78283400 | 5.94267100  |
| C | 4.29235500  | -0.47226700 | 6.18313600  |
| C | 3.57520400  | -2.20634300 | 4.58742600  |
| C | 3.96752500  | -1.36054100 | 3.51380900  |
| C | 2.93653000  | -2.93166700 | 1.89321800  |
| C | 3.73862200  | -1.77570800 | 2.14806200  |
| C | 2.58472200  | -3.25064300 | 0.54836100  |
| C | 3.23660400  | -2.56555100 | -0.52890600 |
| C | 1.80760700  | -3.74614300 | -2.16119700 |
| C | 2.93003600  | -2.92862300 | -1.88451100 |
| C | 1.38308100  | -3.92064100 | -3.53213300 |
| C | 2.25733000  | -3.52894900 | -4.59409000 |
| C | 0.51717200  | -4.15886000 | -6.22406600 |
| C | 1.84541000  | -3.76679900 | -5.95877500 |
| C | 2.40835200  | -3.59418700 | 6.76636800  |
| C | 3.38321200  | -2.65632400 | 7.01182300  |
| C | 1.86999500  | -3.80001500 | 5.43208800  |
| C | 2.61297900  | -3.26179200 | 4.34184400  |
| C | 0.92595200  | -4.08492900 | 2.71912700  |
| C | 2.21369900  | -3.52915700 | 2.98367200  |
| C | 0.45419600  | -4.18160300 | 1.36064000  |
| C | 1.36710900  | -3.96425300 | 0.27519500  |
| C | -0.48357200 | -4.17531300 | -1.35964000 |
| C | 0.91493000  | -4.08521600 | -1.08004600 |
| C | -0.94127900 | -4.07777400 | -2.72532600 |
| C | 0.00003600  | -4.17473400 | -3.81840500 |
| C | -1.85465800 | -3.80682500 | -5.44898900 |
| C | -0.46359600 | -4.17017000 | -5.18899700 |
| C | -2.37666000 | -3.60838200 | -6.78499200 |
| C | -0.48715800 | -4.18343600 | 6.22846500  |
| C | 0.47951800  | -4.18166800 | 5.18380000  |
| C | -1.39026800 | -3.95197900 | 3.53760700  |
| C | -0.00167100 | -4.19168300 | 3.81790100  |
| C | -1.83592400 | -3.78340500 | 2.17286700  |
| C | -0.95343900 | -4.10834600 | 1.08640300  |
| C | -2.63796800 | -3.28579700 | -0.54594700 |
| C | -1.40736000 | -3.97400800 | -0.27294900 |
| C | -2.98128600 | -2.95819600 | -1.90695700 |
| C | -2.23324500 | -3.54088300 | -2.99446000 |

|   |             |             |             |
|---|-------------|-------------|-------------|
| C | -3.56906300 | -2.21956600 | -4.62019000 |
| C | -2.61570900 | -3.27096800 | -4.36095300 |
| C | -3.81984800 | -1.79838400 | -5.97706400 |
| C | -3.34887900 | -2.66689800 | -7.04027000 |
| C | -2.70795500 | -3.35014800 | 7.03176700  |
| C | -1.82052100 | -3.79349700 | 5.97307500  |
| C | -3.31642200 | -2.62439100 | 4.35119300  |
| C | -2.24605700 | -3.55540700 | 4.61526700  |
| C | -3.58153000 | -2.23653700 | 2.98584000  |
| C | -2.98544000 | -2.97297800 | 1.90144500  |
| C | -3.99681400 | -1.39189600 | 0.27132400  |
| C | -3.30683400 | -2.62266200 | 0.54109600  |
| C | -4.12736300 | -0.93384600 | -1.08747900 |
| C | -3.79961800 | -1.81554100 | -2.17511100 |
| C | -3.97742500 | -1.37162900 | -3.53969900 |
| C | -4.24321600 | -0.47574500 | -6.22718700 |
| C | -3.67662000 | -2.40522600 | 6.77272000  |
| C | -4.25117800 | -0.49133100 | 5.18212500  |
| C | -3.87615100 | -1.88065200 | 5.43837300  |
| C | -4.13013700 | -0.94484800 | 2.71789400  |
| C | -4.21144800 | -0.47416500 | 1.35843600  |
| H | 0.20249400  | -4.20341400 | -7.26478900 |
| H | -4.29958200 | -0.15083600 | -7.26416400 |
| H | -0.16287600 | 4.22814900  | -7.26613800 |
| H | 4.36215200  | 0.14123400  | -7.21702200 |
| H | -4.29958400 | 0.15028500  | 7.26435100  |
| H | 4.36220400  | -0.14175900 | 7.21718200  |
| H | 0.20255200  | 4.20284900  | 7.26496800  |
| H | -0.16287100 | -4.22865500 | 7.26632200  |
| H | -1.94014700 | -4.16051400 | -7.61569400 |
| H | -3.66978700 | -2.47259200 | -8.06340200 |
| H | -4.24617700 | 1.98742500  | -7.60135500 |
| H | -2.51149600 | 3.66744500  | -8.05525000 |
| H | 1.98827900  | 4.15280600  | -7.60080200 |
| H | 3.72128000  | 2.46789600  | -8.03028000 |
| H | 4.32554200  | -2.00816900 | -7.56246300 |
| H | 2.56908100  | -3.66069100 | -8.03285800 |
| H | 4.32563000  | 2.00765600  | 7.56262200  |
| H | -4.24620400 | -1.98798400 | 7.60155100  |
| H | -2.51150400 | -3.66798500 | 8.05544600  |
| H | 2.56915600  | 3.66016200  | 8.03302500  |
| H | -3.66975700 | 2.47203900  | 8.06358300  |
| H | -1.94010000 | 4.15994200  | 7.61587300  |
| H | 3.72131000  | -2.46842100 | 8.03044300  |
| H | 1.98828600  | -4.15331000 | 7.60097300  |
| N | 4.24916400  | -0.48325200 | -1.34713900 |
| N | 4.24920000  | 0.48274600  | 1.34729700  |
| C | 0.38919000  | 0.00360400  | 0.01390700  |
| O | 0.38934300  | -0.67551000 | 0.96963600  |
| O | 0.39597700  | 0.68260300  | -0.94189100 |

<sup>1</sup> Tsuzuki, S.; Honda, K.; Uchamaru, T.; Mikami, M.; Tanabe, K. *J. Am. Chem. Soc.* **2000**, *122*, 3746–3753.

<sup>2</sup> Zhao, Y.; Truhlar, D. G. *J. Chem. Theory Comput.* **2005**, *1*, 415–432.

- 
- <sup>3</sup> Johnson, E. R.; Becke, A. D. *J. Chem. Phys.* **2005**, *123*, 024101.
- <sup>4</sup> Sinnokrot, M. O.; Sherrill, C. D. *J. Phys. Chem. A* **2004**, *108*, 10200–10207.
- <sup>5</sup> Mackie, I. D.; DiLabio, G. A. *in preparation*.
- <sup>6</sup> Tsuzuki, S.; Honda, K.; Uchimaru, T.; Mikami, M. *J. Chem. Phys.* **2004**, *120*, 647–659.
- <sup>7</sup> Tsuzuki, S.; Uchimaru, T.; Mikami, M.; Urata, S. *J. Chem. Phys.* **2002**, *116*, 3309–3315.
- <sup>8</sup> Johnson, E. R.; DiLabio, G. A. *Chem. Phys. Lett.* **2006**, *419*, 333–339
- <sup>9</sup> Tsuzuki, S.; Uchimaru, T.; Mikami, M.; Tanabe, K. *J. Chem. Phys.* **1998**, *109*, 2169–2175.
- <sup>10</sup> Tsuzuki, S.; Honda, K.; Uchimaru, T.; Mikami, M.; Tanabe, K. *J. Am. Chem. Soc.* **2000**, *122*, 11450–11458.
- <sup>11</sup> Vogiatzis, K. D.; Mavrandonakis, A.; Klopper, W.; Froudakis, G. E. *ChemPhysChem* **2009**, *10*, 374–383
